# Supplementary material
Source: bioRxiv or medRxiv preprint supplement (https://medrxiv.org/highwire/filestream/94998/field_highwire_adjunct_files/0/2020.08.28.20183681-1.pdf)

S1 Table. Preferred reporting items for systematic reviews and meta-analyses checklist

| Section/topic             | #  | Checklist item                                                                                                                                                                                                                                                                                              | Reported on page # |
|---------------------------|----|-------------------------------------------------------------------------------------------------------------------------------------------------------------------------------------------------------------------------------------------------------------------------------------------------------------|--------------------|
| <b>TITLE</b>              |    |                                                                                                                                                                                                                                                                                                             |                    |
| Title                     | 1  | Identify the report as a systematic review, meta-analysis, or both.                                                                                                                                                                                                                                         | 1                  |
| <b>ABSTRACT</b>           |    |                                                                                                                                                                                                                                                                                                             |                    |
| Structured summary        | 2  | Provide a structured summary including, as applicable: background; objectives; data sources; study eligibility criteria, participants, and interventions; study appraisal and synthesis methods; results; limitations; conclusions and implications of key findings; systematic review registration number. | 2-3                |
| <b>INTRODUCTION</b>       |    |                                                                                                                                                                                                                                                                                                             |                    |
| Rationale                 | 3  | Describe the rationale for the review in the context of what is already known.                                                                                                                                                                                                                              | 4-5                |
| Objectives                | 4  | Provide an explicit statement of questions being addressed with reference to participants, interventions, comparisons, outcomes, and study design (PICOS).                                                                                                                                                  | 5                  |
| <b>METHODS</b>            |    |                                                                                                                                                                                                                                                                                                             |                    |
| Protocol and registration | 5  | Indicate if a review protocol exists, if and where it can be accessed (e.g., Web address), and, if available, provide registration information including registration number.                                                                                                                               | 6                  |
| Eligibility criteria      | 6  | Specify study characteristics (e.g., PICOS, length of follow-up) and report characteristics (e.g., years considered, language, publication status) used as criteria for eligibility, giving rationale.                                                                                                      | 7                  |
| Information sources       | 7  | Describe all information sources (e.g., databases with dates of coverage, contact with study authors to identify additional studies) in the search and date last searched.                                                                                                                                  | 6                  |
| Search                    | 8  | Present full electronic search strategy for at least one database, including any limits used, such that it could be repeated.                                                                                                                                                                               | 6                  |
| Study selection           | 9  | State the process for selecting studies (i.e., screening, eligibility, included in systematic review, and, if applicable, included in the meta-analysis).                                                                                                                                                   | 7                  |
| Data collection process   | 10 | Describe method of data extraction from reports (e.g., piloted forms, independently, in duplicate) and any processes for obtaining and confirming data from investigators.                                                                                                                                  | 7                  |
| Data items                | 11 | List and define all variables for which data were sought (e.g., PICOS, funding sources) and any assumptions and simplifications made.                                                                                                                                                                       | 7                  |

|                                    |    |                                                                                                                                                                                                                        |   |
|------------------------------------|----|------------------------------------------------------------------------------------------------------------------------------------------------------------------------------------------------------------------------|---|
| Risk of bias in individual studies | 12 | Describe methods used for assessing risk of bias of individual studies (including specification of whether this was done at the study or outcome level), and how this information is to be used in any data synthesis. | 8 |
| Summary measures                   | 13 | State the principal summary measures (e.g., risk ratio, difference in means).                                                                                                                                          | 8 |
| Synthesis of results               | 14 | Describe the methods of handling data and combining results of studies, if done, including measures of consistency (e.g., $I^2$ ) for each meta-analysis.                                                              | 8 |

| Section/topic                 | #  | Checklist item                                                                                                                                                                                           | Reported on page # |
|-------------------------------|----|----------------------------------------------------------------------------------------------------------------------------------------------------------------------------------------------------------|--------------------|
| Risk of bias across studies   | 15 | Specify any assessment of risk of bias that may affect the cumulative evidence (e.g., publication bias, selective reporting within studies).                                                             | 8                  |
| Additional analyses           | 16 | Describe methods of additional analyses (e.g., sensitivity or subgroup analyses, meta-regression), if done, indicating which were pre-specified.                                                         | 8                  |
| <b>RESULTS</b>                |    |                                                                                                                                                                                                          |                    |
| Study selection               | 17 | Give numbers of studies screened, assessed for eligibility, and included in the review, with reasons for exclusions at each stage, ideally with a flow diagram.                                          | 9                  |
| Study characteristics         | 18 | For each study, present characteristics for which data were extracted (e.g., study size, PICOS, follow-up period) and provide the citations.                                                             | 9                  |
| Risk of bias within studies   | 19 | Present data on risk of bias of each study and, if available, any outcome level assessment (see item 12).                                                                                                | 9                  |
| Results of individual studies | 20 | For all outcomes considered (benefits or harms), present, for each study: (a) simple summary data for each intervention group (b) effect estimates and confidence intervals, ideally with a forest plot. | 9                  |
| Synthesis of results          | 21 | Present results of each meta-analysis done, including confidence intervals and measures of consistency.                                                                                                  | 12                 |
| Risk of bias across studies   | 22 | Present results of any assessment of risk of bias across studies (see Item 15).                                                                                                                          | 12                 |
| Additional analysis           | 23 | Give results of additional analyses, if done (e.g., sensitivity or subgroup analyses, meta-regression [see Item 16]).                                                                                    | 13                 |
| <b>DISCUSSION</b>             |    |                                                                                                                                                                                                          |                    |
| Summary of evidence           | 24 | Summarize the main findings including the strength of evidence for each main outcome; consider their relevance to key groups (e.g., healthcare providers, users, and policy makers).                     | 13                 |
| Limitations                   | 25 | Discuss limitations at study and outcome level (e.g., risk of bias), and at review-level (e.g., incomplete retrieval of identified research, reporting bias).                                            | 16                 |

|                |    |                                                                                                                                            |    |
|----------------|----|--------------------------------------------------------------------------------------------------------------------------------------------|----|
| Conclusions    | 26 | Provide a general interpretation of the results in the context of other evidence, and implications for future research.                    | 17 |
| <b>FUNDING</b> |    |                                                                                                                                            |    |
| Funding        | 27 | Describe sources of funding for the systematic review and other support (e.g., supply of data); role of funders for the systematic review. | 17 |

*From:* Moher D, Liberati A, Tetzlaff J, Altman DG, The PRISMA Group (2009). Preferred Reporting Items for Systematic Reviews and Meta-Analyses: The PRISMA Statement. PLoS Med 6(7): e1000097. doi:10.1371/journal.pmed1000097

S2 Table. Search strategy in Medline (Pubmed)

| Search | Virus                                                                                                                                                                                                                                                                                                                                                                                                                                                                                                                                                                                                                                                                                                                                                                                                                                                                                                                                                                                                                                                                                                                                                                                                                                                                         |
|--------|-------------------------------------------------------------------------------------------------------------------------------------------------------------------------------------------------------------------------------------------------------------------------------------------------------------------------------------------------------------------------------------------------------------------------------------------------------------------------------------------------------------------------------------------------------------------------------------------------------------------------------------------------------------------------------------------------------------------------------------------------------------------------------------------------------------------------------------------------------------------------------------------------------------------------------------------------------------------------------------------------------------------------------------------------------------------------------------------------------------------------------------------------------------------------------------------------------------------------------------------------------------------------------|
| #1     | “HRSV” OR “RSV” OR “human respiratory syncytial virus”OR “respiratory syncytial virus” OR “HRSV-A” OR “HRSV-B” OR “HMPV” OR “MPV” OR “human metapneumovirus”OR “metapneumovirus” OR “HMPV-A” OR “HMPV-B” OR “HAdV” OR “AdV” OR “Adenovirus” OR “Adenovirus Infections, Human” OR “Human adenovirus” OR “HADV-A” OR “HADV-B” OR “HADV-C” OR “HADV-D” OR “HADV-E” OR “HADV-F” OR “HADV-G” OR “HBoV” OR “BoV” OR “Bocavirus” OR “Bocavirus Infections, Human” OR “Human Bocavirus” OR “HCoV” OR “CoV” OR “Coronavirus” OR “Coronavirus Infections, Human” OR “Human Coronavirus” OR “229E” OR “OC43” OR “NL63” OR “HKU1” OR “HCoV-229E” OR “HCoV-OC43” OR “HCoV-NL63” OR “HCoV-HKU1” OR “HPIV” OR “PIV” OR “Parainfluenzavirus” OR “Parainfluenzavirus Infections, Human” OR “Human Parainfluenzavirus” OR “PIV-1” OR “PIV-2” OR “PIV-3” OR “PIV-4” OR “HPIV-1” OR “HPIV-2” OR “HPIV-3” OR “HPIV-4” OR “HEV” OR “EV” OR “Enterovirus” OR “Enterovirus Infections, Human” OR “Human Enterovirus” OR “HRV” OR “RV” OR “Rhinovirus” OR “Rhinoviruses” OR “Rhinovirus Infections, Human” OR “Human Rhinovirus” OR “RV-A” OR “RV-B” OR “RV-C” OR “Influenza” OR “Inf” OR “Influenza virus” OR “Influenza, Human” OR “Influenza-A virus” OR “Influenza-B virus” OR “Influenza-C virus” |
| #2     | bronchiolitis                                                                                                                                                                                                                                                                                                                                                                                                                                                                                                                                                                                                                                                                                                                                                                                                                                                                                                                                                                                                                                                                                                                                                                                                                                                                 |
| #3     | #1 AND #2                                                                                                                                                                                                                                                                                                                                                                                                                                                                                                                                                                                                                                                                                                                                                                                                                                                                                                                                                                                                                                                                                                                                                                                                                                                                     |

S3 Table. Items for risk of bias assessment

| <b>Hoy et al. tool for cross sectional studies</b>                                                                                                 | <b>Yes (1)/No (0)</b> |
|----------------------------------------------------------------------------------------------------------------------------------------------------|-----------------------|
| <b>External validity</b>                                                                                                                           |                       |
| 1. Was the study's target population a close representation of the national population in relation to relevant variables?                          | <b>1</b>              |
| 2. Was the sampling frame a true or close representation of the bronchiolitis population?                                                          | <b>1</b>              |
| 3. Was some form of random selection used to select the sample, OR was a census undertaken?                                                        | <b>1</b>              |
| 4. Was the likelihood of non response bias minimal?                                                                                                | <b>1</b>              |
| <b>Internal validity</b>                                                                                                                           |                       |
| 5. Were data collected directly from the subjects (as opposed to a proxy)?                                                                         | <b>1</b>              |
| 6. Was an acceptable bronchiolitis case definition used in the study?                                                                              | <b>1</b>              |
| 7. Was the study viral detection assay shown to have validity and reliability?                                                                     | <b>1</b>              |
| 8. Was the same mode type of sample collected for all subjects?                                                                                    | <b>1</b>              |
| 9. Was the length of the shortest prevalence period for the parameter of interest appropriate?                                                     | <b>1</b>              |
| 10. Were the numerator(s) and denominator(s) for the parameter of interest appropriate?                                                            | <b>1</b>              |
| Total score                                                                                                                                        | <b>10</b>             |
| <b>Interpretation of the risk of bias tool</b>                                                                                                     |                       |
| <ul style="list-style-type: none"> <li>• 7-10: Low risk of bias</li> <li>• 4-6: Moderate risk of bias</li> <li>• 0-3: High risk of bias</li> </ul> |                       |

S4 Table. Main reasons of exclusion of eligible studies

| N° | Name, Year                | Title                                                                                                                                                                                            | Reason of exclusion                                     |
|----|---------------------------|--------------------------------------------------------------------------------------------------------------------------------------------------------------------------------------------------|---------------------------------------------------------|
| 1  | Akhras, 2010              | Human metapneumovirus and respiratory syncytial virus: subtle differences but comparable severity                                                                                                | No molecular assays used                                |
| 2  | Alonso, 2007              | Bronchiolitis due to respiratory syncytial virus in hospitalized children: a study of seasonal rhythm.                                                                                           | Only positive samples included                          |
| 3  | Al-Shawwa, 2007           | Clinical and therapeutic variables influencing hospitalisation for bronchiolitis in a community-based paediatric group practice                                                                  | No molecular assays used                                |
| 4  | Al-Shehri, 2005           | Bronchiolitis in Abha, Southwest Saudi Arabia: viral etiology and predictors for hospital admission.                                                                                             | No molecular assays used                                |
| 5  | Alvarez, 2013             | Epidemiological and genetic characteristics associated with the severity of acute viral bronchiolitis by respiratory syncytial virus.                                                            | Systematic review                                       |
| 6  | Amér, 2009                | [Not only RSV can cause bronchiolitis in small children                                                                                                                                          | Full text not found                                     |
| 7  | Bakalovic, 2015           | Epidemiological Features of Bronchiolitis in the Pediatric Clinic of Clinical center of Sarajevo University.                                                                                     | Data on detection assay not reported                    |
| 8  | Barr, 2018                | Change in viral bronchiolitis management in hospitals in the UK after the publication of NICE guideline.                                                                                         | No data on viral etiology searched                      |
| 9  | Bashir, 2017              | Respiratory syncytial virus and influenza are the key viral pathogens in children <2 years hospitalized with bronchiolitis and pneumonia in Islamabad Pakistan.                                  | Not possible to extract data on viral etiology searched |
| 10 | Bauert, 2019              | Rhinovirus Species in Children With Severe Bronchiolitis: Multicenter Cohort Studies in the United States and Finland                                                                            | Duplicates                                              |
| 11 | Bennett, 2018             | Population-based trends and underlying risk factors for infant respiratory syncytial virus and bronchiolitis hospitalizations.                                                                   | Inappropriate study population                          |
| 12 | Berezin, 2006             | Rhinovirus and bronchiolitis.                                                                                                                                                                    | Comments                                                |
| 13 | Bilavsky, 2010            | Respiratory syncytial virus-positive bronchiolitis in hospitalized infants is associated with thrombocytosis.                                                                                    | No molecular assays used                                |
| 14 | Bochkov, 2020             | A 14-year Prospective Study of Human Coronavirus Infections in Hospitalized Children: Comparison With Other Respiratory Viruses.                                                                 | Inappropriate study population                          |
| 15 | Bouscambert-Duchamp, 2005 | Detection of human metapneumovirus RNA sequences in nasopharyngeal aspirates of young French children with acute bronchiolitis by real-time reverse transcriptase PCR and phylogenetic analysis. | Duplicate of Janahi, 2017                               |
| 16 | Boyce, 2004               | Incidence of bronchiolitis-associated hospitalization among children in Olmsted County, Minnesota.                                                                                               | Comments                                                |
| 17 | Boyce, 2016               | More on Viral Bronchiolitis in Children.                                                                                                                                                         | Comments                                                |

|    |                                                        |                                                                                                                                                                  |                                                         |
|----|--------------------------------------------------------|------------------------------------------------------------------------------------------------------------------------------------------------------------------|---------------------------------------------------------|
| 18 | Bradley, 2005                                          | Severity of respiratory syncytial virus bronchiolitis is affected by cigarette smoke exposure and atopy.                                                         | Only positive samples included                          |
| 19 | Brini, 2018                                            | Temporal and climate characteristics of respiratory syncytial virus bronchiolitis in neonates and children in Sousse, Tunisia, during a 13-year surveillance     | No molecular assays used                                |
| 20 | Brini, 2020                                            | Temporal and climate characteristics of respiratory syncytial virus bronchiolitis in neonates and children in Sousse, Tunisia, during a 13-year surveillance.    | Inappropriate detection assay                           |
| 21 | Calvo, 2015                                            | Respiratory Syncytial Virus Coinfections With Rhinovirus and Human Bocavirus in Hospitalized Children                                                            | > 2 years                                               |
| 22 | Cantani, 1999                                          | Bronchiolitis in infants.                                                                                                                                        | No data on viral etiology searched                      |
| 23 | Causse, 2007                                           | Preliminary evaluation of a multiplex reverse transcription-PCR assay combined with a new DNA chip hybridization assay for detecting respiratory syncytial virus | > 2 years                                               |
| 24 | Cavallin, 2013                                         | Infection with multiple viruses is not associated with increased disease severity in children with bronchiolitis.                                                | Comments                                                |
| 25 | Centers for Disease Control and Prevention (CDC), 2003 | Bronchiolitis-associated outpatient visits and hospitalizations among American Indian and Alaska Native children--United States, 1990-2000.                      | Report                                                  |
| 26 | Chan, 2002                                             | Risk factors for hypoxemia and respiratory failure in respiratory syncytial virus bronchiolitis.                                                                 | Only positive samples included                          |
| 27 | Chee, 2010                                             | Emergency Department Septic Screening in Respiratory Syncytial Virus (RSV) and Non-RSV Bronchiolitis.                                                            | No molecular assays used                                |
| 28 | Chen, 2004                                             | [Clinical characteristics of bronchiolitis caused by human metapneumovirus in infants]                                                                           | Full text not found                                     |
| 29 | Chen, 2014                                             | Viral etiology of bronchiolitis among pediatric inpatients in northern Taiwan with emphasis on newly identified respiratory viruses.                             | Combination of multiple assays for detection            |
| 30 | Ciarlito, 2019                                         | Respiratory Syncytial Virus A and B: three bronchiolitis seasons in a third level hospital in Italy.                                                             | Inappropriate study population                          |
| 31 | Connors, 2016                                          | Viral Bronchiolitis in Children.                                                                                                                                 | Comments                                                |
| 32 | Coskun, 2017                                           | Risk factors for intensive care need in children with bronchiolitis: A case-control study.                                                                       | Data on detection assay not reported                    |
| 33 | Côté, 2003                                             | Comparative evaluation of real-time PCR assays for detection of the human metapneumovirus                                                                        | No data on viral etiology searched                      |
| 34 | CRONE, 1964                                            | SEROLOGICAL EVIDENCE OF INFECTION BY RESPIRATORY SYNCYTIAL VIRUS IN OUTBREAK OF ACUTE BRONCHIOLITIS                                                              | No molecular assays used                                |
| 35 | Cubie, 1992                                            | Detection of respiratory syncytial virus in acute bronchiolitis in infants                                                                                       | Not possible to extract data on viral etiology searched |

|    |                      |                                                                                                                                                                                                                    |                                |
|----|----------------------|--------------------------------------------------------------------------------------------------------------------------------------------------------------------------------------------------------------------|--------------------------------|
| 36 | Dagan, 1993          | Hospitalization of Jewish and Bedouin infants in southern Israel for bronchiolitis caused by respiratory syncytial virus                                                                                           | No molecular assays used       |
| 37 | Davies, 2017         | A systematic review of the psychometric properties of bronchiolitis assessment tools.                                                                                                                              | Systematic review              |
| 38 | DeVincenzo, 2016     | Viral Bronchiolitis in Children.                                                                                                                                                                                   | Comments                       |
| 39 | Dotan, 2013          | Hospitalization for respiratory syncytial virus bronchiolitis and disease severity in twins.                                                                                                                       | Only positive samples included |
| 40 | Duttweiler, 2004     | Pulmonary and systemic bacterial co-infections in severe RSV bronchiolitis.                                                                                                                                        | Only positive samples included |
| 41 | Eidelman, 2009       | The burden of respiratory syncytial virus bronchiolitis on a pediatric inpatient service.                                                                                                                          | No molecular assays used       |
| 42 | Erculj, 2018         | PM10 exposure is associated with increased hospitalizations for respiratory syncytial virus bronchiolitis among infants in Lombardy, Italy.                                                                        | Only positive samples included |
| 43 | Erez, 2012           | [Prevalence of H1N1 A influenza virus infection among hospitalized patients with bronchiolitis twelve months old and younger]                                                                                      | Full text not found            |
| 44 | Eugene-Ruellan, 1998 | Detection of respiratory syncytial virus A and B and parainfluenzavirus 3 sequences in respiratory tracts of infants by a single PCR with primers targeted to the L-polymerase gene and differential hybridization | Age range not reported         |
| 45 | FANDRE, 1964         | [EPIDEMIC OF ACUTE BRONCHIOLITIS IN INFANTS. ISOLATION OF A RESPIRATORY SYNEYTIAL VIRUS]                                                                                                                           | Full text not found            |
| 46 | Fauroux, 2017        | The Burden and Long-term Respiratory Morbidity Associated with Respiratory Syncytial Virus Infection in Early Childhood.                                                                                           | Systematic review              |
| 47 | Fedele, 2018         | Analysis of the immune response in infants hospitalized with viral bronchiolitis shows different Th1/Th2 profiles associated with respiratory syncytial virus and human rhinovirus.                                | Inappropriate study population |
| 48 | Ferronato, 2012      | Etiological diagnosis reduces the use of antibiotics in infants with bronchiolitis.                                                                                                                                | No molecular assays used       |
| 49 | Fjaerli, 2004        | Hospitalisations for respiratory syncytial virus bronchiolitis in Akershus, Norway, 1993-2000: a population-based retrospective study.                                                                             | No molecular assays used       |
| 50 | Flaherman, 2010      | Respiratory syncytial virus testing during bronchiolitis episodes of care in an integrated health care delivery system: a retrospective cohort study.                                                              | No molecular assays used       |
| 51 | Flamant, 2005        | Severe respiratory syncytial virus bronchiolitis in children: from short mechanical ventilation to extracorporeal membrane oxygenation.                                                                            | No molecular assays used       |
| 52 | Flores, 2004         | Bronchiolitis caused by respiratory syncytial virus in an area of portugal: epidemiology, clinical features, and risk factors.                                                                                     | > 2 years                      |
| 53 | Fodha, 2007          | Respiratory syncytial virus infections in hospitalized infants: association between viral load, virus subgroup, and disease severity                                                                               | Only positive samples included |



|    |                         |                                                                                                                                                |                                              |
|----|-------------------------|------------------------------------------------------------------------------------------------------------------------------------------------|----------------------------------------------|
| 54 | Foley, 2018             | Respiratory health inequality starts early: The impact of social determinants on the aetiology and severity of bronchiolitis in infancy.       | No molecular assays used                     |
| 55 | Foo, 1991               | Severe bronchiolitis in children                                                                                                               | Full text not found                          |
| 56 | FORBES, 1961            | Epidemic bronchiolitis caused by a respiratory syncytial virus: clinical aspects                                                               | Conference abstract                          |
| 57 | Fretzayas, 2017         | Etiology and clinical features of viral bronchiolitis in infancy.                                                                              | Review                                       |
| 58 | Freymouth, 2003         | Presence of the new human metapneumovirus in French children with bronchiolitis.                                                               | Age range not reported                       |
| 59 | Fujiogi, 2020           | Association of rhinovirus species with nasopharyngeal metabolome in bronchiolitis infants: A multicenter study.                                | Duplicates                                   |
| 60 | Ganu, 2012              | Increase in use of non-invasive ventilation for infants with severe bronchiolitis is associated with decline in intubation rates over a decade | Data on detection assay not reported         |
| 61 | Garcia, 2010            | Risk factors in children hospitalized with RSV bronchiolitis versus non-RSV bronchiolitis.                                                     | No molecular assays used                     |
| 62 | Garcia-Marcos, 2014     | Pediatricians' attitudes and costs of bronchiolitis in the emergency department: a prospective multicentre study.                              | No data on viral etiology searched           |
| 63 | Ghazaly, 2018           | Characteristics of children admitted to intensive care with acute bronchiolitis.                                                               | Combination of multiple assays for detection |
| 64 | Ghazaly, 2018           | Characteristics of children admitted to intensive care with acute bronchiolitis.                                                               | Inappropriate detection assay                |
| 65 | Giordano, 2018          | Respiratory syncytial virus bronchiolitis and hypertransaminasemia.                                                                            | Case report                                  |
| 66 | Gold, 2006              | [Respiratory syncytial virus bronchiolitis: severe respiratory forms in hospitalized infants]                                                  | Review                                       |
| 67 | González Martínez, 2013 | [Clinical impact of introducing ventilation with high flow oxygen in the treatment of bronchiolitis in a paediatric ward]                      | No molecular assays used                     |
| 68 | Goto-Sugai, 2010        | Genotyping and phylogenetic analysis of the major genes in respiratory syncytial virus isolated from infants with bronchiolitis.               | Only positive samples included               |
| 69 | Greensill, 2003         | Human metapneumovirus in severe respiratory syncytial virus bronchiolitis.                                                                     | Age range not reported                       |
| 70 | Grimaldi, 2002          | [Prospective regional study of an epidemic of respiratory syncytial virus]                                                                     | Only positive samples included               |
| 71 | Grimwood, 2008          | Risk factors for respiratory syncytial virus bronchiolitis hospital admission in New Zealand.                                                  | Combination of multiple assays for detection |
| 72 | Grubbauer, 1989         | [Respiratory insufficiency in acute bronchiolitis in infancy]                                                                                  | Full text not found                          |
| 73 | Haque, 2012             | Bronchiolitis outbreak caused by respiratory syncytial virus in southwest Bangladesh, 2010.                                                    | Outbreak                                     |
| 74 | Hasegawa, 2014          | Multicenter study of viral etiology and relapse in hospitalized children with bronchiolitis.                                                   | Duplicate of Dumas, 2016                     |
| 75 | Hasegawa, 2014          | Infectious pathogens and bronchiolitis outcomes.                                                                                               | Review                                       |
| 76 | Hasegawa, 2015          | Risk factors for requiring intensive care among children admitted to ward with bronchiolitis.                                                  | Duplicate of Dumas, 2016                     |

|    |                 |                                                                                                                                                                            |                                      |
|----|-----------------|----------------------------------------------------------------------------------------------------------------------------------------------------------------------------|--------------------------------------|
| 77 | Hasegawa, 2015  | Respiratory syncytial virus genomic load and disease severity among children hospitalized with bronchiolitis: multicenter cohort studies in the United States and Finland. | Duplicate of Dumas, 2016             |
| 78 | Hasegawa, 2018  | Rhinovirus Species in Children with Severe Bronchiolitis: Multicenter Cohort Studies in the US and Finland.                                                                | Duplicate of Dumas, 2016             |
| 79 | Hasegawa, 2019  | Respiratory Virus Epidemiology Among US Infants With Severe Bronchiolitis: Analysis of 2 Multicenter, Multiyear Cohort Studies.                                            | Duplicates                           |
| 80 | Hasegawa, 2019  | Association of Rhinovirus C Bronchiolitis and Immunoglobulin E Sensitization During Infancy With Development of Recurrent Wheeze.                                          | Duplicates                           |
| 81 | Heinonen, 2018  | Transient Tachypnea of the Newborn is Associated with an Increased Risk of Hospitalization Due to RSV Bronchiolitis.                                                       | Data on detection assay not reported |
| 82 | Hendaus, 2014   | Does cesarean section pose a risk of respiratory syncytial virus bronchiolitis in infants and children?                                                                    | > 2 years                            |
| 83 | Henderson, 1979 | The etiologic and epidemiologic spectrum of bronchiolitis in pediatric practice                                                                                            | No molecular assays used             |
| 84 | Hervas, 2012    | Epidemiology of hospitalization for acute bronchiolitis in children: differences between RSV and non-RSV bronchiolitis.                                                    | No molecular assays used             |
| 85 | Houben, 2011    | Clinical prediction rule for RSV bronchiolitis in healthy newborns: prognostic birth cohort study                                                                          | Not bronchiolitis                    |
| 86 | Howidi, 2007    | The severity of respiratory syncytial virus bronchiolitis in young infants in the United Arab Emirates.                                                                    | No molecular assays used             |
| 87 | Huguenin, 2012  | Broad respiratory virus detection in infants hospitalized for bronchiolitis by use of a multiplex RT-PCR DNA microarray system.                                            | Age range not reported               |
| 88 | Hyvarinen, 2011 | Outcome after bronchiolitis depends on disease definition.                                                                                                                 | Only positive samples included       |
| 89 | Jacques, 2006   | Association of respiratory picornaviruses with acute bronchiolitis in French infants.                                                                                      | Duplicate of Janahi, 2017            |
| 90 | Jacques, 2008   | Human Bocavirus quantitative DNA detection in French children hospitalized for acute bronchiolitis.                                                                        | > 2 years                            |
| 91 | Jartti, 2015    | Rhinovirus-induced bronchiolitis: Lack of association between virus genomic load and short-term outcomes                                                                   | Duplicate of Dumas, 2016             |
| 92 | Jelić, 1990     | [A bronchiolitis epidemic caused by respiratory syncytial viruses]                                                                                                         | Full text not found                  |
| 93 | Jevsnik, 2016   | The Role of Human Coronaviruses in Children Hospitalized for Acute Bronchiolitis, Acute Gastroenteritis, and Febrile Seizures: A 2-Year Prospective Study.                 | > 2 years                            |
| 94 | Jhavar, 2003    | Severe bronchiolitis in children.                                                                                                                                          | Review                               |
| 95 | Kabir, 2003     | Evaluation of hospitalized infants and young children with bronchiolitis-a multi centre study.                                                                             | Full text not found                  |
| 96 | Karr, 2009      | Infant exposure to fine particulate matter and traffic and risk of hospitalization for RSV                                                                                 | No data on viral etiology searched   |

|     |                     |                                                                                                                                                       |                                                         |
|-----|---------------------|-------------------------------------------------------------------------------------------------------------------------------------------------------|---------------------------------------------------------|
|     |                     | bronchiolitis in a region with lower ambient air pollution.                                                                                           |                                                         |
| 97  | Kassis, 2009        | [The burden and outcomes of acute bronchiolitis among young children hospitalized in Israel]                                                          | Full text not found                                     |
| 98  | Kemper, 2005        | Hospital readmission for bronchiolitis.                                                                                                               | No data on viral etiology searched                      |
| 99  | Korppi, 2012        | Upper age limit for bronchiolitis: 12 months or 6 months?                                                                                             | Comments                                                |
| 100 | Korppi, 2015        | Bronchiolitis: the disease of <6-month-old, <12-month-old or <24-month-old infants.                                                                   | Comments                                                |
| 101 | Kua, 2017           | Systematic Review and Meta-Analysis of the Efficacy and Safety of Combined Epinephrine and Corticosteroid Therapy for Acute Bronchiolitis in Infants. | Systematic review                                       |
| 102 | Laham, 2017         | Clinical Profiles of Respiratory Syncytial Virus Subtypes A AND B Among Children Hospitalized with Bronchiolitis.                                     | Duplicate of Dumas, 2016                                |
| 103 | Lanari, 2015        | Prenatal tobacco smoke exposure increases hospitalizations for bronchiolitis in infants.                                                              | No data on viral etiology searched                      |
| 104 | Lanari, 2015        | Risk factors for bronchiolitis hospitalization during the first year of life in a multicenter Italian birth cohort.                                   | No data on viral etiology searched                      |
| 105 | Lanari, 2016        | Exposure to vehicular traffic is associated to a higher risk of hospitalization for bronchiolitis during the first year of life.                      | Full text not found                                     |
| 106 | Legg, 2005          | Frequency of detection of picornaviruses and seven other respiratory pathogens in infants                                                             | Not bronchiolitis                                       |
| 107 | Lin, 2009           | [Detection of human metapneumovirus and human bocavirus in children with bronchiolitis in east Guangdong area]                                        | Full text not found                                     |
| 108 | López-Huertas, 2005 | Two RT-PCR based assays to detect human metapneumovirus in nasopharyngeal aspirates                                                                   | Not bronchiolitis                                       |
| 109 | Lowther, 2000       | Bronchiolitis-associated hospitalizations among American Indian and Alaska Native children.                                                           | No data on viral etiology searched                      |
| 110 | Luo, 2014           | A systematic review of predictive modeling for bronchiolitis.                                                                                         | Systematic review                                       |
| 111 | Mação, 2011         | [Acute bronchiolitis: a prospective study]                                                                                                            | Data on detection assay not reported                    |
| 112 | Macfarlane, 2005    | RSV testing in bronchiolitis: which nasal sampling method is best?                                                                                    | No molecular assays used                                |
| 113 | Mandal, 2017        | Bronchiolitis: Comparative Study between Respiratory Syncytial Virus                                                                                  | Comments                                                |
| 114 | Mandal, 2017        | Bronchiolitis: Comparative Study between Respiratory Syncytial Virus (RSV) and Non RSV Aetiology.                                                     | Comments                                                |
| 115 | Mansbach, 2008      | Prospective multicenter study of the viral etiology of bronchiolitis in the emergency department                                                      | Not possible to extract data on viral etiology searched |
| 116 | Mansbach, 2012      | Prospective multicenter study of viral etiology and hospital length of stay in children with severe bronchiolitis                                     | Duplicate of Dumas, 2016                                |
| 117 | Mansbach, 2016      | Children Hospitalized with Rhinovirus Bronchiolitis Have Asthma-Like Characteristics.                                                                 | Duplicate of Dumas, 2016                                |

|     |                     |                                                                                                                                                              |                                                         |
|-----|---------------------|--------------------------------------------------------------------------------------------------------------------------------------------------------------|---------------------------------------------------------|
| 118 | Mansbach, 2016      | Respiratory syncytial virus and rhinovirus severe bronchiolitis are associated with distinct nasopharyngeal microbiota.                                      | Comments                                                |
| 119 | Mansbach, 2018      | Haemophilus-dominant nasopharyngeal microbiota is associated with delayed clearance of respiratory syncytial virus in infants hospitalized for bronchiolitis | Duplicate of Mansbach, 2016                             |
| 120 | Mansbach, 2019      | Association between rhinovirus species and nasopharyngeal microbiota in infants with severe bronchiolitis.                                                   | Duplicates                                              |
| 121 | Mansbach, 2020      | Detection of respiratory syncytial virus or rhinovirus weeks after hospitalization for bronchiolitis and the risk of recurrent wheezing.                     | Duplicates                                              |
| 122 | Marguet, 2009       | In very young infants severity of acute bronchiolitis depends on carried viruses.                                                                            | Combination of multiple assays for detection            |
| 123 | McCuskee, 2014      | Bronchiolitis and pneumonia requiring hospitalization in young first nations children in Northern Ontario, Canada.                                           | Not possible to extract data on viral etiology searched |
| 124 | McErlean, 2007      | Characterisation of a newly identified human rhinovirus, HRV-QPM, discovered in infants with bronchiolitis.                                                  | > 2 years                                               |
| 125 | McNally, 2014       | Vitamin D receptor (VDR) polymorphisms and severe RSV bronchiolitis: a systematic review and meta-analysis.                                                  | Systematic review                                       |
| 126 | McNamara, 2007      | Impact of human metapneumovirus and respiratory syncytial virus co-infection in severe bronchiolitis.                                                        | Age range not reported                                  |
| 127 | Meissner, 2016      | Viral Bronchiolitis in Children.                                                                                                                             | Comments                                                |
| 128 | Meissner, 2016      | More on Viral Bronchiolitis in Children.                                                                                                                     | Comments                                                |
| 129 | Meissner, 2016      | Viral Bronchiolitis in Children.                                                                                                                             | Review                                                  |
| 130 | Mikalsen, 2012      | The outcome after severe bronchiolitis is related to gender and virus.                                                                                       | Only positive samples included                          |
| 131 | Miron, 2010         | Sole pathogen in acute bronchiolitis: is there a role for other organisms apart from respiratory syncytial virus?                                            | Combination of multiple assays for detection            |
| 132 | Molinari Such, 2005 | Respiratory syncytial virus-related bronchiolitis in Puerto Rico.                                                                                            | Only positive samples included                          |
| 133 | Munoz-Quiles, 2016  | Population-based Analysis of Bronchiolitis Epidemiology in Valencia, Spain.                                                                                  | No data on viral etiology searched                      |
| 134 | Murray, 2014        | Risk factors for hospital admission with RSV bronchiolitis in England: a population-based birth cohort study.                                                | No data on viral etiology searched                      |
| 135 | Naja, 2019          | Bronchiolitis Admissions in a Lebanese Tertiary Medical Center: A 10 Years' Experience.                                                                      | Inappropriate study population                          |
| 136 | Najioullah, 2020    | Seasonality and coinfection of bronchiolitis: epidemiological specificity and consequences in terms of prophylaxis in tropical climate.                      | Inappropriate detection assay                           |
| 137 | Narbona-Lopez, 2018 | Prevention of syncytial respiratory virus infection with palivizumab: descriptive and comparative analysis after 12 years of use.                            | Full text not found                                     |

|     |                        |                                                                                                                                                                                                   |                                                         |
|-----|------------------------|---------------------------------------------------------------------------------------------------------------------------------------------------------------------------------------------------|---------------------------------------------------------|
| 138 | Nenna, 2017            | Modifiable risk factors associated with bronchiolitis.                                                                                                                                            | No data on viral etiology searched                      |
| 139 | Neves Barreira, 2001   | [Relationship between respiratory syncytial virus subtype and clinical severity in bronchiolitis]                                                                                                 | Full text not found                                     |
| 140 | Nicolai, 2013          | Viral bronchiolitis in children: a common condition with few therapeutic options.                                                                                                                 | Review                                                  |
| 141 | O'Connor, 2013         | The changing epidemiology of the bronchiolitis epidemic in Tallaght Hospital.                                                                                                                     | Full text not found                                     |
| 142 | Oliveira-Santos, 2016  | Influence of meteorological conditions on RSV infection in Portugal                                                                                                                               | No molecular assays used                                |
| 143 | Ong, 2001              | A comparison of nested polymerase chain reaction and immunofluorescence for the diagnosis of respiratory infections in children with bronchiolitis, and the implications for a cohorting strategy | No molecular assays used                                |
| 144 | Ozkaya-Parlakay, 2019  | Viral Etiology of Bronchiolitis Among Pediatric Patients.                                                                                                                                         | Inappropriate study design                              |
| 145 | Papadopoulos, 2004     | Does respiratory syncytial virus subtype influence the severity of acute bronchiolitis in hospitalized infants?                                                                                   | Only positive samples included                          |
| 146 | Paranhos-Baccalà, 2008 | Mixed respiratory virus infections                                                                                                                                                                | Review                                                  |
| 147 | Paul, 2017             | Respiratory-syncytial-virus- and rhinovirus-related bronchiolitis in children aged <2 years in an English district general hospital.                                                              | Not possible to extract data on viral etiology searched |
| 148 | Perrin, 1986           | [Predictive indicators of the severity of bronchiolitis caused by respiratory syncytial virus in infants]                                                                                         | Full text not found                                     |
| 149 | Pichler, 2000          | Severe adenovirus bronchiolitis in children.                                                                                                                                                      | Case report                                             |
| 150 | Pickles, 2015          | Respiratory syncytial virus (RSV) and its propensity for causing bronchiolitis.                                                                                                                   | Review                                                  |
| 151 | Piedimonte, 2014       | Respiratory syncytial virus infection and bronchiolitis.                                                                                                                                          | Review                                                  |
| 152 | Prais, 2003            | Admission to the intensive care unit for respiratory syncytial virus bronchiolitis: a national survey before palivizumab use.                                                                     | No molecular assays used                                |
| 153 | Pruikkonen, 2014       | Infants under 6 months with bronchiolitis are most likely to need major medical interventions in the 5 days after onset.                                                                          | No molecular assays used                                |
| 154 | Rahbarimanesh, 2018    | Viral Aetiology of Bronchiolitis in Hospitalised Children in a Tertiary Center in Tehran.                                                                                                         | No molecular assays used                                |
| 155 | Rahbarimanesh, 2018    | Viral Aetiology of Bronchiolitis in Hospitalised Children in a Tertiary Center in Tehran.                                                                                                         | Inappropriate detection assay                           |
| 156 | Ralston, 2009          | Incidence of apnea in infants hospitalized with respiratory syncytial virus bronchiolitis: a systematic review.                                                                                   | Systematic review                                       |
| 157 | Ramagopal, 2016        | Demographic, Clinical and Hematological Profile of Children with Bronchiolitis: A Comparative Study between Respiratory Syncytial Virus [RSV] and [Non RSV] Groups.                               | > 2 years                                               |
| 158 | Rivera-Sepulveda, 2017 | Epidemiology of bronchiolitis: a description of emergency department visits and hospitalizations in Puerto Rico, 2010-2014.                                                                       | No data on viral etiology searched                      |

|     |                           |                                                                                                                                                                                                                                                          |                                              |
|-----|---------------------------|----------------------------------------------------------------------------------------------------------------------------------------------------------------------------------------------------------------------------------------------------------|----------------------------------------------|
| 159 | Rodl, 2012                | Prospective evaluation of clinical scoring systems in infants with bronchiolitis admitted to the intensive care unit.                                                                                                                                    | No data on viral etiology searched           |
| 160 | Rodriguez-Fernandez, 2017 | Respiratory Syncytial Virus Genotypes, Host Immune Profiles, and Disease Severity in Young Children Hospitalized With Bronchiolitis.                                                                                                                     | Only positive samples included               |
| 161 | Rodriguez-Martinez, 2018  | Predictors of prolonged length of hospital stay for infants with bronchiolitis.                                                                                                                                                                          | No molecular assays used                     |
| 162 | Rossi, 2016               | Viral Bronchiolitis in Children.                                                                                                                                                                                                                         | Comments                                     |
| 163 | Ryu, 2015                 | Etiology and Outcome of Diffuse Acute Infectious Bronchiolitis in Adults.                                                                                                                                                                                | Combination of multiple assays for detection |
| 164 | Saijo, 1994               | The role of respiratory syncytial virus in acute bronchiolitis in small children in northern Japan                                                                                                                                                       | No molecular assays used                     |
| 165 | Sala, 2015                | Factors associated with disease severity in children with bronchiolitis.                                                                                                                                                                                 | No data on viral etiology searched           |
| 166 | Sanchez-Luna, 2016        | Trends in respiratory syncytial virus bronchiolitis hospitalizations in children less than 1 year: 2004-2012.                                                                                                                                            | No data on viral etiology searched           |
| 167 | Sarkar, 2018              | Comparative Study between Noninvasive Continuous Positive Airway Pressure and Hot Humidified High-flow Nasal Cannulae as a Mode of Respiratory Support in Infants with Acute Bronchiolitis in Pediatric Intensive Care Unit of a Tertiary Care Hospital. | No data on viral etiology searched           |
| 168 | Scagnolari, 2012          | Evaluation of viral load in infants hospitalized with bronchiolitis caused by respiratory syncytial virus.                                                                                                                                               | Only positive samples included               |
| 169 | Schaller, 2017            | Bronchiolitis in Infants and Children.                                                                                                                                                                                                                   | Review                                       |
| 170 | Semple, 2005              | Dual infection of infants by human metapneumovirus and human respiratory syncytial virus is strongly associated with severe bronchiolitis.                                                                                                               | Age range not reported                       |
| 171 | Semple, 2011              | Household tobacco smoke and admission weight predict severe bronchiolitis in infants independent of deprivation: prospective cohort study.                                                                                                               | No molecular assays used                     |
| 172 | Shadman, 2012             | 50 years ago in The Journal of Pediatrics: Observations on the etiology of acute bronchiolitis in infants.                                                                                                                                               | Review                                       |
| 173 | Shang, 2014               | Elective cesarean delivery as a predisposing factor of respiratory syncytial virus bronchiolitis in children                                                                                                                                             | > 2 years                                    |
| 174 | Shay, 2001                | Bronchiolitis-associated mortality and estimates of respiratory syncytial virus-associated deaths among US children, 1979-1997.                                                                                                                          | No data on viral etiology searched           |
| 175 | Shmueli, 2017             | Real-life comparison of three general paediatric wards showed similar outcomes for children with bronchiolitis despite different treatment regimens.                                                                                                     | No molecular assays used                     |
| 176 | Simon, 2007               | Detection of bocavirus DNA in nasopharyngeal aspirates of a child with bronchiolitis.                                                                                                                                                                    | Case report                                  |
| 177 | Sloan, 2013               | Spatiotemporal patterns of infant bronchiolitis in a Tennessee Medicaid population.                                                                                                                                                                      | No data on viral etiology searched           |
| 178 | Smyth, 2002               | Respiratory syncytial virus bronchiolitis: disease severity, interleukin-8, and virus genotype.                                                                                                                                                          | Only positive samples included               |

|     |                        |                                                                                                                                            |                                              |
|-----|------------------------|--------------------------------------------------------------------------------------------------------------------------------------------|----------------------------------------------|
| 179 | Soo, 2017              | Pulmonary hemorrhage as a complication of Respiratory Syncytial Virus (RSV) bronchiolitis.                                                 | Case report                                  |
| 180 | Stempel, 2009          | Multiple viral respiratory pathogens in children with bronchiolitis.                                                                       | No data on viral etiology searched           |
| 181 | Stevenson, 2016        | Prenatal Versus Postnatal Tobacco Smoke Exposure and Intensive Care Use in Children Hospitalized With Bronchiolitis.                       | Duplicate of Dumas, 2016                     |
| 182 | Stewart, 2019          | Association of respiratory viruses with serum metabolome in infants with severe bronchiolitis.                                             | Duplicates                                   |
| 183 | Stollar, 2014          | Virologic testing in bronchiolitis: does it change management decisions and predict outcomes?                                              | Combination of multiple assays for detection |
| 184 | Tecu, 2006             | The viral bronchiolites diagnosis in children by PCR multiplex                                                                             | Full text not found                          |
| 185 | Tecu, 2012             | The adenoviral infections in children admitted to hospital with pneumonia, acute bronchiolitis or respiratory viral infections.            | Full text not found                          |
| 186 | Toivonen, 2019         | Association between rhinovirus species and nasopharyngeal microbiota in infants with severe bronchiolitis                                  | Duplicate of Mansbach, 2016                  |
| 187 | Tortora, 2015          | Adenovirus species C detection in children under four years of age with acute bronchiolitis or recurrent wheezing.                         | > 2 years                                    |
| 188 | Toyoshima, 2011        | Bronchiolitis caused by pandemic influenza A (H1N1) 2009.                                                                                  | Case report                                  |
| 189 | Tsolia, 2003           | Epidemiology of respiratory syncytial virus bronchiolitis in hospitalized infants in Greece.                                               | No molecular assays used                     |
| 190 | Tumba, 2020            | Temporal trend of hospitalizations for acute bronchiolitis in infants under one year of age in Brazil between 2008 and 2015.               | No data on respiratory viruses prevalence    |
| 191 | Valdivia, 1997         | Analysis of respiratory syncytial virus in clinical samples by reverse transcriptase-polymerase chain reaction restriction mapping         | Age range not reported                       |
| 192 | Van Rostenberghe, 2006 | RSV and bronchiolitis.                                                                                                                     | Comments                                     |
| 193 | van Woensel, 2002      | Bronchiolitis hospitalisations in the Netherlands from 1991 to 1999.                                                                       | No data on viral etiology searched           |
| 194 | Vicente, 1978          | [Etiologic importance of the respiratory syncytial virus in bronchiolitis]                                                                 | Full text not found                          |
| 195 | Wall, 2016             | Viral Bronchiolitis in Children.                                                                                                           | Comments                                     |
| 196 | Werno, 2004            | Human metapneumovirus in children with bronchiolitis or pneumonia in New Zealand.                                                          | > 2 years                                    |
| 197 | Willson, 2003          | Complications in infants hospitalized for bronchiolitis or respiratory syncytial virus pneumonia.                                          | Data on detection assay not reported         |
| 198 | Wolfler, 2018          | The infant with severe bronchiolitis: from HFNC to CPAP and mechanical ventilation.                                                        | Review                                       |
| 199 | Wright, 2002           | Illness severity, viral shedding, and antibody responses in infants hospitalized with bronchiolitis caused by respiratory syncytial virus. | Only positive samples included               |
| 200 | Yitshak-Sade, 2017     | Air Pollution and Hospitalization for Bronchiolitis among Young Children.                                                                  | No data on viral etiology searched           |

|     |              |                                                                                                                                       |                                      |
|-----|--------------|---------------------------------------------------------------------------------------------------------------------------------------|--------------------------------------|
| 201 | Yi-Wei, 2018 | A molecular epidemiological study of respiratory syncytial virus circulating in southern Zhejiang Province, China, from 2009 to 2014. | Inappropriate detection assay        |
| 202 | Yorita, 2007 | Severe bronchiolitis and respiratory syncytial virus among young children in Hawaii.                                                  | Data on detection assay not reported |
| 203 | Zhang, 2017  | [Molecular biological and clinical characteristics of respiratory syncytial virus in children with bronchiolitis]                     | Full text not found                  |



SS Table. Individual characteristics of included studies

| Name, Year              | Male (%)             | Age                                                       | Age Range | Period               | Design          | Sampling             | Timing          | Country     | Language    | Bias                | Setting               | Case definition                                                                                                                                                                                                                                                                                                                                                                                                                                                                                                                         | Sample type             | Virus Searched                                       | Viral diagnostic method       |
|-------------------------|----------------------|-----------------------------------------------------------|-----------|----------------------|-----------------|----------------------|-----------------|-------------|-------------|---------------------|-----------------------|-----------------------------------------------------------------------------------------------------------------------------------------------------------------------------------------------------------------------------------------------------------------------------------------------------------------------------------------------------------------------------------------------------------------------------------------------------------------------------------------------------------------------------------------|-------------------------|------------------------------------------------------|-------------------------------|
| Chen, 2014              | 97                   | 1-6 months (n = 259)                                      | < 1 Year  | Oct 2011-May 2012    | Cross-sectional | Consecutive          | Prospectively   | France      | English     | Medium risk         | Outpatient            | Brochialis was diagnosed by the presence of a recent history of acute respiratory tract infection followed by onset of respiratory distress with cough, tachypnea, retractions and diffuse crackles, or wheezing on auscultation, in accordance with the national recommendations for the diagnosis and management of acute bronchiolitis (McConnochie et al. 2009)                                                                                                                                                                     | Nonpharyngeal secretion | RSV, HMPV, Influenza, EV, HAIV, HBoV, HPPV, HCoV, EV | Real-time PCR                 |
| Antoni, 2010            | Not reported         | Not reported                                              | < 1 Year  | Nov 2002-Aug 2008    | Cross-sectional | Consecutive          | Prospectively   | Peru        | English     | Medium risk         | Outpatient            | Brochialis was diagnosed by the presence of a recent history of acute respiratory tract infection followed by onset of respiratory distress with cough, tachypnea, retractions and diffuse crackles, or wheezing on auscultation, in accordance with the national recommendations for the diagnosis and management of acute bronchiolitis (McConnochie et al. 2009)                                                                                                                                                                     | Nonpharyngeal secretion | RSV, HMPV, Influenza, EV, HAIV, HBoV, HPPV, HCoV, EV | Real-time PCR                 |
| Almohdhi, 2010          | Not reported         | Not reported                                              | < 1 Year  | July 2009            | Cross-sectional | Consecutive          | Prospectively   | Iran        | Non-English | Medium risk         | Outpatient            | Brochialis was diagnosed by the presence of a recent history of acute respiratory tract infection followed by onset of respiratory distress with cough, tachypnea, retractions and diffuse crackles, or wheezing on auscultation, in accordance with the national recommendations for the diagnosis and management of acute bronchiolitis (McConnochie et al. 2009)                                                                                                                                                                     | Nonpharyngeal secretion | RSV, HMPV, Influenza, EV, HAIV, HBoV, HPPV, HCoV, EV | Real-time PCR                 |
| Arora, 2014             | 51.6                 | 0-6, 6-15, 15-30 months                                   | < 1 Year  | Nov 2011-May 2012    | Cross-sectional | Consecutive          | Prospectively   | Turkey      | English     | Low risk            | Outpatient            | Brochialis was defined as a clinical picture of respiratory tract infection with cough, tachypnea, retractions and/or wheezing on auscultation, in accordance with the national recommendations for the diagnosis and management of acute bronchiolitis (McConnochie et al. 2009)                                                                                                                                                                                                                                                       | Nonpharyngeal secretion | RSV, HMPV, Influenza, EV, HAIV, HBoV, HPPV, HCoV, EV | Real-time multiplex PCR       |
| Banbajger, 2012         | 62                   | 17.8 ± 16.6 weeks                                         | < 1 Year  | Dec 2009-Mar 2009    | Cross-sectional | Consecutive          | Prospectively   | Israel      | English     | Low risk            | Outpatient            | Acute BR was diagnosed clinically in these subjects with upper respiratory tract infection (URTI) with cough and/or rhinorrhea with signs of acute respiratory distress, tachypnea, wheezing, or rales on auscultation                                                                                                                                                                                                                                                                                                                  | Nonpharyngeal secretion | RSV, HMPV, Influenza, EV, HAIV, HBoV, HPPV, HCoV, EV | PCR                           |
| Bakker, 2013            | 54.2                 | 1-2 months                                                | < 1 Year  | Dec 2011-Mar 2012    | Cross-sectional | Consecutive          | Prospectively   | Netherlands | English     | Low risk            | Outpatient            | Brochialis was defined as acute respiratory distress, accompanied by cough, cough, inspiratory crackles and/or wheezing on auscultation                                                                                                                                                                                                                                                                                                                                                                                                 | Nonpharyngeal secretion | RSV, HMPV, EV, HAIV, HBoV, HPPV, HCoV, EV            | Real-time PCR                 |
| Bakker, 2019            | 59                   | 4:9 (1.4-7.3) mo                                          | < 1 Year  | Dec-Mar 2012-2016    | Cross-sectional | Consecutive sampling | Prospectively   | Netherlands | English     | Medium risk of bias | Outpatient            | Brochialis was defined as acute respiratory distress accompanied by cough, cough, inspiratory crackles and/or wheezing on auscultation                                                                                                                                                                                                                                                                                                                                                                                                  | Nonpharyngeal secretion | RSV, HMPV, Influenza, EV, HAIV, HBoV, HPPV, HCoV, EV | Real-time PCR                 |
| Bonati, 2012            | 61                   | 4.7 ± 0.39 months                                         | < 1 Year  | 2006-2009 (Nov-Apr)  | Cross-sectional | Consecutive          | Prospectively   | Iran        | English     | Low risk            | Outpatient/Outpatient | Brochialis was defined as acute infection of the lower airways, characterized by increased respiratory effort (tachypnea and/or use of accessory respiratory muscles) and accessory wheezing and/or crackles and/or rales                                                                                                                                                                                                                                                                                                               | Nonpharyngeal secretion | RSV, HMPV, Influenza, EV, HAIV, HBoV, HPPV, HCoV, EV | PCR                           |
| Calvo, 2010             | 55                   | 7.6 ± 7.7 months                                          | < 1 Year  | Sept 2009-Aug 2008   | Cross-sectional | Consecutive          | Prospectively   | Spain       | English     | Low risk            | Outpatient            | Acute bronchiolitis was diagnosed as the first episode of acute lower respiratory distress with previous signs of viral respiratory infection - whether or not the episode associated to respiratory distress or pneumonia in children under 2 years old                                                                                                                                                                                                                                                                                | Nonpharyngeal secretion | RSV, HMPV, Influenza, EV, HAIV, HBoV, HPPV, HCoV, EV | PCR                           |
| Campana, 2016           | 54.6                 | Median age 2.1 (1.3-3.0) months                           | < 1 Year  | 2006-2014 (Oct-May)  | Cross-sectional | Consecutive          | Prospectively   | Italy       | English     | Low risk            | Outpatient            | Acute bronchiolitis was clinically defined as the first episode of acute lower respiratory tract infection in infants less than 12 months, characterized by the acute onset of cough, tachypnea, retractions, and diffuse crackles on chest auscultation                                                                                                                                                                                                                                                                                | Nonpharyngeal secretion | RSV, HMPV, Influenza, EV, HAIV, HBoV, HPPV, HCoV, EV | PCR                           |
| Chen, 2014              | 67.3                 | Mean 225 of days 99% CI 204-270 days                      | < 1 Year  | Jan 2009-Dec 2010    | Cross-sectional | Consecutive          | Prospectively   | China       | English     | Low risk            | Outpatient            | Acute bronchiolitis was defined as the first episode of cough, rhinorrhea, wheezing, or rales, with chest radiographic findings of over-inflation and peribronchovascular interstitial with or without pulmonary consolidation within 2 days                                                                                                                                                                                                                                                                                            | Nonpharyngeal secretion | HMPV, HBoV                                           | PCR                           |
| Davis-Koon, 2018        | Unclear/Not reported | 2-8 ± 2.4 months<br>8.1 months (SD 6.7)                   | < 1 Year  | Nov 2004-Feb 2007    | Cross-sectional | Consecutive sampling | Retrospectively | South Korea | Non-English | Medium risk of bias | Outpatient            | Brochialis (as defined by the American Academy of Pediatrics) of acute respiratory illness with acute combination of rhinorrhea, cough, tachypnea, wheezing, crackles and retractions, and was younger than 2 years                                                                                                                                                                                                                                                                                                                     | Nonpharyngeal secretion | RSV, HMPV, Influenza, EV, HAIV, HBoV, HPPV, HCoV, EV | Real-time PCR                 |
| Davis, 2016             | 59                   | 1-8 months (SD 3.2)                                       | < 1 Year  | 2007-2010 (Nov-Mar)  | Cross-sectional | Consecutive          | Prospectively   | USA         | English     | Low risk            | Outpatient            | Brochialis (as defined by the American Academy of Pediatrics) of acute respiratory illness with some combination of rhinorrhea, cough, tachypnea, wheezing, crackles and retractions, and was younger than 2 years                                                                                                                                                                                                                                                                                                                      | Nonpharyngeal secretion | RSV, EV                                              | PCR                           |
| Elgharib, 2009          | Not reported         | Not reported                                              | < 1 Year  | Oct 2002-Sep 2005    | Cross-sectional | Consecutive          | Prospectively   | Egypt       | English     | Medium risk         | Outpatient            | Not reported                                                                                                                                                                                                                                                                                                                                                                                                                                                                                                                            | Nonpharyngeal secretion | EV                                                   | PCR                           |
| Elgharib, 2017          | Not reported         | 1-6.5 months                                              | < 1 Year  | Oct 2012-Oct 2016    | Cross-sectional | Consecutive          | Prospectively   | Egypt       | English     | Low risk            | Outpatient            | Brochialis (as defined by the American Academy of Pediatrics) of acute respiratory illness with acute combination of rhinorrhea, cough, tachypnea, wheezing, crackles and retractions, and was younger than 2 years                                                                                                                                                                                                                                                                                                                     | Nonpharyngeal secretion | RSV, HMPV, Influenza, EV, HAIV, HBoV, HPPV, HCoV, EV | Real-time PCR                 |
| Hardoon, 2018           | 60.8                 | 3.60 ± 3.56 months                                        | < 1 Year  | Jan 2010-Dec 2012    | Cross-sectional | Consecutive          | Retrospectively | Qatar       | English     | Medium risk         | Outpatient            | The diagnosis of bronchiolitis was based on the definition suggested by the American Academy of pediatrics, (based on diagnosis and assessment of bronchiolitis)                                                                                                                                                                                                                                                                                                                                                                        | Nonpharyngeal secretion | RSV, EV, HAIV, HBoV, HPPV, HCoV, EV                  | Real-time PCR                 |
| Janji, 2017             | 67                   | Not reported                                              | < 1 Year  | 2010-2011            | Cross-sectional | Consecutive          | Retrospectively | Qatar       | English     | Low risk            | Outpatient            | Acute bronchiolitis defined according to International Classification of Disease (ICD) code 463.1 in the 10th revision of the ICD. Based on a medical diagnosis, an episode of acute bronchiolitis was determined by a combination of clinical signs and symptoms including fever, rhinorrhea, tachypnea, cough, wheezing, crackles, use of accessory muscles and possible chest X-ray findings of hyperinflation of the lung, post-bronchial hyperinflation, collapsed segment or a lobe of the lung and increase intercostal markings | Nonpharyngeal secretion | RSV, HMPV, Influenza, EV, HAIV, HBoV, HPPV, HCoV, EV | Real-time PCR                 |
| Jani, 2014              | 61                   | 8.1 months (SD 6.7)                                       | < 1 Year  | 2007-2010 (Nov-Mar)  | Cross-sectional | Consecutive          | Prospectively   | Finland     | English     | Low risk            | Outpatient            | Brochialis (as defined by the American Academy of Pediatrics) of acute respiratory illness with acute combination of rhinorrhea, cough, tachypnea, wheezing, crackles and retractions, and was younger than 2 years                                                                                                                                                                                                                                                                                                                     | Nonpharyngeal secretion | HMPV, Influenza, EV, HAIV, HBoV, HPPV, HCoV, EV      | PCR                           |
| Manbach, 2008           | 61                   | Median age of 6.1 months (IQR 3.1 to 10.2)                | < 1 Year  | Oct 2003-Mar 2006    | Cohort          | Consecutive          | Prospectively   | USA         | English     | Medium risk         | Outpatient            | The diagnosis of bronchiolitis was confirmed by children younger than 2 years with acute tachypnea, retractions, and abnormal breath sounds who did not meet criteria for a diagnosis of pneumonia or another respiratory diagnosis. As defined by the AAP in its 2000 position statement, children with bronchiolitis typically have "rhinorrhea, tachypnea, wheezing, cough, crackles, use of accessory muscles, and/or nasal flaring" 12                                                                                             | Nonpharyngeal secretion | RSV, HMPV, Influenza, EV, HAIV, HBoV, HPPV, HCoV, EV | Real-time PCR                 |
| Manbach, 2016           | Not reported         | Not reported                                              | < 1 Year  | 2011-2014 (Nov-Apr)  | Cohort          | Consecutive          | Prospectively   | USA         | English     | Low risk            | Outpatient            | Brochialis (as defined by the American Academy of Pediatrics) acute respiratory illness with acute combination of rhinorrhea, cough, tachypnea, wheezing, crackles and retractions, and was younger than 2 years                                                                                                                                                                                                                                                                                                                        | Nonpharyngeal secretion | RSV, EV                                              | PCR                           |
| Maldita, 2010           | 57                   | 2.5 ± 2.1 months                                          | < 1 Year  | 2006-2007 (Oct-May)  | Cross-sectional | Consecutive          | Prospectively   | Italy       | English     | Low risk            | Outpatient            | Brochialis was diagnosed according to the presence of a history of acute respiratory tract infection followed by acute onset of respiratory distress with cough, tachypnea, retractions and/or wheezing on auscultation                                                                                                                                                                                                                                                                                                                 | Nasal secretion         | RSV, HMPV, Influenza, EV, HAIV, HBoV, HPPV, HCoV, EV | PCR                           |
| Maldita, 2018           | Not reported         | Not reported                                              | < 1 Year  | 2006-2017 (Sep-May)  | Cross-sectional | Consecutive          | Prospectively   | Italy       | English     | Low risk            | Outpatient            | Brochialis was defined as a clinical picture of respiratory tract infection with cough, tachypnea, retractions, and/or wheezing on auscultation, in accordance with the national recommendations for the diagnosis and management of acute bronchiolitis (McConnochie et al. 2009)                                                                                                                                                                                                                                                      | Nonpharyngeal secretion | RSV                                                  | PCR                           |
| Miller, 2013            | Not reported         | Not reported                                              | < 1 Year  | 2004-2008 (Sep-May)  | Cohort          | Consecutive          | Prospectively   | USA         | English     | Low risk            | Outpatient/Outpatient | Brochialis was defined as lower respiratory infection in infants presenting with wheezing, rales, and/or rhinorrhea                                                                                                                                                                                                                                                                                                                                                                                                                     | Nonpharyngeal secretion | RSV, HMPV, Influenza, EV, HPPV, HCoV, EV             | PCR                           |
| Narayanan, 2010         | 65                   | Median age was 6 ± 4 months                               | < 1 Year  | Mar 2006-Jul 2007    | Cross-sectional | Consecutive          | Prospectively   | Israel      | English     | Low risk            | Outpatient            | Brochialis was defined as the first episode of wheezing associated with signs of an upper respiratory tract infection                                                                                                                                                                                                                                                                                                                                                                                                                   | Nonpharyngeal secretion | RSV, HMPV, Influenza, EV, HAIV, HBoV, HPPV, HCoV, EV | PCR, RT-PCR, Real-time RT-PCR |
| Naves, 2020             | Unclear/Not reported | Unclear/Not reported                                      | < 1 Year  | Unclear/Not reported | Cross-sectional | Consecutive sampling | Prospectively   | Italy       | English     | Medium risk of bias | Outpatient            | Brochialis was defined as an acute infection of the lower airway characterized by increased respiratory effort (tachypnea and/or use of accessory respiratory muscles) and accessory wheezing and/or crackles and/or rales                                                                                                                                                                                                                                                                                                              | Nonpharyngeal secretion | HBoV, HMPV, HRSV, EV                                 | Classical PCR                 |
| Naves, 2020             | Unclear/Not reported | Unclear/Not reported                                      | < 1 Year  | Unclear/Not reported | Cross-sectional | Consecutive sampling | Prospectively   | Italy       | English     | Medium risk of bias | Outpatient            | Brochialis was defined as an acute infection of the lower airway characterized by increased respiratory effort (tachypnea and/or use of accessory respiratory muscles) and accessory wheezing and/or crackles and/or rales                                                                                                                                                                                                                                                                                                              | Nonpharyngeal secretion | HBoV, HMPV, HRSV, EV                                 | Classical RT-PCR              |
| Papadopoulos, 2002      | 61.3                 | 1-3 months                                                | < 1 Year  | Oct 1999-Sep 2000    | Cross-sectional | Consecutive          | Prospectively   | Greece      | English     | Low risk            | Outpatient            | Brochialis was defined as acute infection of the lower airway characterized by increased respiratory effort (tachypnea and/or use of accessory respiratory muscles) and accessory wheezing and/or crackles and/or rales                                                                                                                                                                                                                                                                                                                 | Nonpharyngeal secretion | RSV, HMPV, Influenza, EV, HAIV, HBoV, HPPV, HCoV, EV | PCR                           |
| Papoff, 2011            | 66.8                 | Median (interquartile, IQR) was 6.1 days (1.3-19.4) days  | < 1 Year  | 2006-2009 (Oct-May)  | Cross-sectional | Consecutive          | Prospectively   | Italy       | English     | Low risk            | Outpatient            | Brochialis was diagnosed clinically according to the presence of a history of upper respiratory tract infection followed by acute onset of respiratory distress with cough, tachypnea, retractions, and/or wheezing on auscultation, in accordance with the national recommendations for the diagnosis and management of acute bronchiolitis (McConnochie et al. 2009)                                                                                                                                                                  | Nasal secretion         | RSV, HMPV, Influenza, EV, HAIV, HBoV, HPPV, HCoV, EV | PCR                           |
| Pereira, 2018           | 54.1                 | Median age 2.03 months (range 0.23-11.17)                 | < 1 Year  | 2006-2010 (Oct-May)  | Cross-sectional | Consecutive          | Retrospectively | Italy       | English     | Low risk            | Outpatient            | Brochialis was clinically defined as the first episode of acute lower respiratory tract infection, characterized by the acute onset of cough, tachypnea, retractions, and diffuse crackles on chest auscultation in infants younger than 12 months 13                                                                                                                                                                                                                                                                                   | Nonpharyngeal secretion | RSV, EV                                              | PCR                           |
| Phalen, 2017            | 60.8                 | 6.7 (6.3-7.1) months                                      | < 1 Year  | Oct 2010-Apr 2011    | Cross-sectional | Consecutive          | Prospectively   | USA         | English     | Low risk            | Outpatient            | Brochialis was defined as a physician diagnosis in children less than 24 months of age with wheezing and/or rales, which history of respiratory tract infection with cough, tachypnea, wheezing, crackles and retractions, and was younger than 2 years                                                                                                                                                                                                                                                                                 | Nonpharyngeal secretion | EV                                                   | Real-time PCR                 |
| Pitlor, 2009            | 56                   | Median 7 (1.2-5.0) months                                 | < 1 Year  | May 2012-Sep 2012    | Cross-sectional | Consecutive          | Prospectively   | Brazil      | Non-English | Medium risk         | Outpatient            | BA was defined as the first episode of wheezing, associated with signs and symptoms of acute viral infection and/or rhinorrhea                                                                                                                                                                                                                                                                                                                                                                                                          | Nonpharyngeal secretion | EV                                                   | RT-PCR                        |
| Prank, 2018             | 61.2                 | Not reported                                              | < 1 Year  | May 2014-Oct 2008    | Cross-sectional | Consecutive          | Retrospectively | Slovenia    | English     | Medium risk         | Outpatient/Outpatient | Patients were identified through a query of the electronic medical record based on bronchiolitis diagnosis (ICD 10 J21.0-21.9)                                                                                                                                                                                                                                                                                                                                                                                                          | Nonpharyngeal secretion | RSV, EV, HBoV                                        | RT-PCR                        |
| Racati, 2011            | Not reported         | Not reported                                              | < 1 Year  | Sep 2007-Oct 2008    | Cross-sectional | Consecutive          | Prospectively   | Spain       | English     | Low risk            | Outpatient            | Patients were identified through a query of the electronic medical record based on bronchiolitis diagnosis (ICD 10 J21.0-21.9)                                                                                                                                                                                                                                                                                                                                                                                                          | Nonpharyngeal secretion | RSV, HMPV, Influenza, EV, HAIV, HBoV, HPPV, HCoV, EV | RT-PCR                        |
| Racati, 2011            | Not reported         | Not reported                                              | < 1 Year  | Oct 2007-Oct 2008    | Cross-sectional | Consecutive          | Prospectively   | Spain       | English     | Low risk            | Outpatient            | Brochialis was diagnosed according to the presence of the first acute respiratory tract infection characterized by respiratory distress (tachypnea, use of accessory muscles), cough, widespread crackles, wheezing or both, associated with signs of viral infection (nasal)                                                                                                                                                                                                                                                           | Nonpharyngeal secretion | RSV, HMPV, Influenza, EV, HAIV, HBoV, HPPV, HCoV, EV | RT-PCR, Real-time RT-PCR      |
| Racati, 2014            | 60.8                 | 41.7 (15.70-51.3) (Median (95% confidence interval) days) | < 1 Year  | Jan 2006-Oct 2008    | Cross-sectional | Consecutive          | Prospectively   | Spain       | English     | Low risk            | Outpatient            | Brochialis was defined as a physician diagnosis in children less than 24 months of age with wheezing and/or rales, which history of respiratory tract infection with cough, tachypnea, wheezing, crackles and retractions, and was younger than 2 years                                                                                                                                                                                                                                                                                 | Nonpharyngeal secretion | RSV, HMPV, Influenza, EV, HAIV, HBoV, HPPV, HCoV, EV | PCR                           |
| Richard, 2008           | Not reported         | Not reported                                              | < 1 Year  | 2003-2008 (Sep-Apr)  | Cross-sectional | Consecutive          | Retrospectively | France      | English     | Medium risk         | Outpatient            | Not reported                                                                                                                                                                                                                                                                                                                                                                                                                                                                                                                            | Nonpharyngeal secretion | RSV, HMPV, Influenza, EV, HAIV, HBoV, HPPV, HCoV, EV | PCR as NASBA                  |
| Rodriguez-Acevedo, 2018 | 60.5                 | 6 (6.0-7.7) months                                        | < 1 Year  | Sep 2012-Jan 2013    | Cross-sectional | Consecutive          | Retrospectively | Mexico      | English     | Low risk            | Outpatient            | Acute bronchiolitis was defined as rhinorrhea, cough, tachypnea, wheezing, rales, and increased respiratory effort (e.g., grunting, nasal flaring, and intercostal and/or subcostal retractions), with symptoms of acuity (e.g., increased respiratory rate, retractions, and oxygen saturation < 90% or lower) 25                                                                                                                                                                                                                      | Nonpharyngeal secretion | RSV, HMPV, Influenza, EV, HAIV, HBoV, HPPV, HCoV, EV | RT-PCR, NASBA                 |
| Sabrino Garcia, 2012    | 53.6                 | 1.6 (1.3-1.9) months                                      | < 1 Year  | Dec 2008-Apr 2009    | Cross-sectional | Consecutive          | Prospectively   | Spain       | Non-English | Low risk            | Outpatient            | The diagnosis of bronchiolitis was established according to the McConnochie definition: defined as the first acute episode of respiratory distress with wheezing associated with careful pathology in children under 2 years old                                                                                                                                                                                                                                                                                                        | Nonpharyngeal secretion | RSV, HMPV, Influenza, EV, HAIV, HBoV, HPPV, HCoV, EV | RT-PCR                        |
| Seem, 2016              | Not reported         | Not reported                                              | < 1 Year  | Sep 2010-Aug 2011    | Cross-sectional | Consecutive          | Prospectively   | Brazil      | English     | Low risk            | Outpatient            | Acute bronchiolitis (based on predominant symptoms, with wheezing, crackles, and tachypnea) having been recorded within the first 48 h of hospitalization, and being a ? 75-h history of clinical manifestations of lower respiratory tract infection (viral or respiratory distress)                                                                                                                                                                                                                                                   | Nonpharyngeal secretion | RSV, HMPV, EV                                        | Real-time PCR                 |
| Seif, 2019              | 53.9                 | 4 months                                                  | < 1 Year  | 2016-2017            | Cross-sectional | Consecutive sampling | Prospectively   | Greece      | English     | Medium risk of bias | Outpatient            | Unclear/Not reported                                                                                                                                                                                                                                                                                                                                                                                                                                                                                                                    | Nonpharyngeal secretion | RSV                                                  | Classical RT-PCR              |
| Shi, 2018               | 52.8                 | Not reported                                              | < 1 Year  | Nov 2007-May 2013    | Cross-sectional | Consecutive sampling | Prospectively   | South Korea | Non-English | Low risk of bias    | Outpatient            | Brochialis was defined as acute infection of the lower airway characterized by increased respiratory effort (tachypnea and/or use of accessory respiratory muscles) and accessory wheezing and/or crackles and/or rales                                                                                                                                                                                                                                                                                                                 | Nonpharyngeal secretion | RSV, HMPV, Influenza, EV, HAIV, HBoV, HPPV, HCoV, EV | Real-time PCR                 |
| Tzouvelekis, 2007       | Not reported         | Not reported                                              | < 1 Year  | Apr 2002-Aug 2006    | Cross-sectional | Consecutive          | Prospectively   | Greece      | English     | Low risk            | Outpatient            | Brochialis was defined as acute infection of the lower airway characterized by increased respiratory effort (tachypnea and/or use of accessory respiratory muscles) and accessory wheezing and/or crackles and/or rales                                                                                                                                                                                                                                                                                                                 | Nonpharyngeal secretion | RSV, HMPV, Influenza, EV, HAIV, HBoV, HPPV, HCoV, EV | RT-PCR                        |
| Tzouvelekis, 2007       | Not reported         | Not reported                                              | < 1 Year  | Apr 2002-Aug 2006    | Cross-sectional | Consecutive          | Prospectively   | Greece      | English     | Low risk of bias    | Outpatient            | Brochialis was defined as acute infection of the lower airway characterized by increased respiratory effort (tachypnea and/or use of accessory respiratory muscles) and accessory wheezing and/or crackles and/or rales                                                                                                                                                                                                                                                                                                                 | Nonpharyngeal secretion | RSV, HMPV, Influenza, EV, HAIV, HBoV, HPPV, HCoV, EV | Real-time PCR                 |
| Uyar, 2014              | 72.8                 | 1.78 ± 1.53 months                                        | < 1 Year  | Jan 2010-Jun 2010    | Cross-sectional | Consecutive          | Prospectively   | Turkey      | Non-English | Low risk            | Outpatient            | Diagnosis of acute bronchiolitis: upper respiratory tract infection, discharge, cough, mild fever, agitation, tachypnea, wheezing, crackles, and/or rales on auscultation, with or without rhinorrhea, wheezing, or rales on auscultation, in accordance with the national recommendations for the diagnosis and management of acute bronchiolitis (McConnochie et al. 2009)                                                                                                                                                            | Nonpharyngeal secretion | RSV, HMPV, Influenza, EV, HAIV, HBoV, HPPV, HCoV, EV | Multiple PCR                  |
| Vizcarra, 2017          | 64                   | 2.1 months (SD 1.4)                                       | < 1 Year  | 2011-2013            | Cross-sectional | Consecutive          | Prospectively   | Brazil      | English     | Medium risk         | Outpatient            | Acute bronchiolitis was defined as acute respiratory tract infection characterized by increased respiratory effort (tachypnea and/or use of accessory respiratory muscles) and accessory wheezing and/or crackles and/or rales                                                                                                                                                                                                                                                                                                          | Nasal secretion         | RSV                                                  | Real-time PCR                 |
| Wang, 2015              | 66.4                 | Not reported                                              | < 1 Year  | 2010-Dec 2013        | Cross-sectional | Consecutive          | Prospectively   | China       | English     | Low risk            | Outpatient            | The bronchiolitis was defined as the first wheezing event, beginning more than 1 week before hospital admission                                                                                                                                                                                                                                                                                                                                                                                                                         | Nonpharyngeal secretion | RSV                                                  | Real-time PCR                 |
| Wittmann, 2018          | Unclear/Not reported | Unclear/Not reported                                      | < 1 Year  | 2006-2014            | Cross-sectional | Consecutive sampling | Prospectively   | Brazil      | English     | Medium risk of bias | Outpatient            | The bronchiolitis was defined based on the guidelines described by Zhu Feng, Practical Pediatrics, 3rd Edition (13)                                                                                                                                                                                                                                                                                                                                                                                                                     | Nonpharyngeal secretion | RSV, HMPV, Influenza, EV, HAIV, HBoV, HPPV, HCoV, EV | Real-time RT-PCR              |
| Xapapichit, 2004        | Not reported         | Not reported                                              | < 1 Year  | Oct 1999-Sep 2000    | Cross-sectional | Consecutive          | Prospectively   | Greece      | English     | Low risk            | Outpatient            | Brochialis was defined as acute infection of the lower airway characterized by increased respiratory effort (tachypnea and/or use of accessory respiratory muscles) and accessory wheezing and/or crackles and/or rales                                                                                                                                                                                                                                                                                                                 | Nonpharyngeal secretion | HMPV                                                 | PCR                           |
| Yoon, 2014              | Unclear/Not reported | Unclear/Not reported                                      | < 1 Year  | Jan 2014 (Winter)    | Cross-sectional | Consecutive sampling | Prospectively   | China       | Non-English | Medium risk of bias | Unclear/Not reported  | Unclear/Not reported                                                                                                                                                                                                                                                                                                                                                                                                                                                                                                                    | Nonpharyngeal secretion | HBoV, HRSV                                           | Classical PCR                 |
| Zhou, 2015              | Not reported         | Not reported                                              | < 1 Year  | 2012-2014 (Winter)   | Cross-sectional | Consecutive          | Prospectively   | China       | Non-English | Medium risk of bias | Unclear/Not reported  | Unclear/Not reported                                                                                                                                                                                                                                                                                                                                                                                                                                                                                                                    | Nonpharyngeal secretion | RSV                                                  | Nonpharyngeal secretion       |

S6 Table. Global prevalence and sensitivity analyses of respiratory viral infections in children &lt; 2 years with bronchiolitis

|                                | Prevalence [95% CI] | 95% Prediction interval | N Studies | N Cases | H [95% CI]    | I <sup>2</sup> [95% CI] | P-Value Heterogeneity | P-Value Egger test |
|--------------------------------|---------------------|-------------------------|-----------|---------|---------------|-------------------------|-----------------------|--------------------|
| <b>HRSV</b>                    |                     |                         |           |         |               |                         |                       |                    |
| Overall                        | 59.2 [54.7-63.6]    | [29.1-85.9]             | 45        | 15351   | 5.5 [5.1-6]   | 96.8 [96.2-97.2]        | < 0.001               | 0.415              |
| < 1 Year                       | 62.3 [55.7-68.6]    | [32.4-87.8]             | 18        | 6779    | 5.4 [4.7-6.1] | 96.5 [95.5-97.3]        | < 0.001               | 0.878              |
| Hospitalized                   | 60.6 [55.9-65.2]    | [32.8-85.2]             | 34        | 12867   | 5.3 [4.8-5.8] | 96.4 [95.7-97]          | < 0.001               | 0.601              |
| Bronchiolitis definition given | 60.4 [56-64.8]      | [32.4-85.2]             | 40        | 14456   | 5.3 [4.8-5.7] | 96.4 [95.7-97]          | < 0.001               | 0.473              |
| Cross sectional design         | 57.2 [52.3-62]      | [27.2-84.5]             | 39        | 12992   | 5.4 [5-5.9]   | 96.6 [96-97.2]          | < 0.001               | 0.395              |
| Low risk of bias               | 59.4 [54.1-64.5]    | [30.4-85.2]             | 30        | 11024   | 5.4 [4.9-5.9] | 96.5 [95.8-97.2]        | < 0.001               | 0.325              |
| <b>RV</b>                      |                     |                         |           |         |               |                         |                       |                    |
| Overall                        | 19.3 [16.7-22]      | [6.3-37]                | 36        | 12967   | 3.7 [3.3-4.2] | 92.8 [90.9-94.2]        | < 0.001               | 0.318              |
| < 1 Year                       | 16.9 [13.4-20.7]    | [4.8-34]                | 15        | 5382    | 3.4 [2.8-4.1] | 91.5 [87.6-94.1]        | < 0.001               | 0.856              |
| Hospitalized                   | 18 [15.1-21.1]      | [5-36.4]                | 28        | 11159   | 4 [3.5-4.5]   | 93.8 [92-95.1]          | < 0.001               | 0.142              |
| Bronchiolitis definition given | 19.2 [16.6-22]      | [6.2-37.2]              | 35        | 12787   | 3.8 [3.4-4.2] | 93 [91.2-94.4]          | < 0.001               | 0.315              |
| Cross sectional design         | 19.9 [16.9-23.2]    | [5.9-39.4]              | 30        | 10833   | 4 [3.5-4.5]   | 93.6 [91.9-95]          | < 0.001               | 0.315              |
| Low risk of bias               | 21 [18-24.2]        | [8-37.9]                | 25        | 9414    | 3.5 [3-4]     | 91.6 [88.9-93.7]        | < 0.001               | 0.304              |
| <b>HBoV</b>                    |                     |                         |           |         |               |                         |                       |                    |
| Overall                        | 8.2 [5.6-11.2]      | [0-27.3]                | 24        | 8706    | 4.7 [4.1-5.3] | 95.4 [94.1-96.4]        | < 0.001               | 0.748              |
| < 1 Year                       | 8 [2.4-16.6]        | [0-49]                  | 8         | 3104    | 7.3 [6.2-8.6] | 98.1 [97.4-98.7]        | < 0.001               | 0.864              |

|                                | <b>Prevalence [95% CI]</b> | <b>95% Prediction interval</b> | <b>N Studies</b> | <b>N Cases</b> | <b>H [95% CI]</b> | <b>I2 [95% CI]</b> | <b>P-Value Heterogeneity</b> | <b>P-Value Egger test</b> |
|--------------------------------|----------------------------|--------------------------------|------------------|----------------|-------------------|--------------------|------------------------------|---------------------------|
| Hospitalized                   | 8 [5-11.6]                 | [0-28.6]                       | 18               | 7335           | 5.2 [4.5-5.9]     | 96.2 [95.1-97.1]   | < 0.001                      | 0.853                     |
| Bronchiolitis definition given | 8.2 [5.5-11.3]             | [0-27.8]                       | 23               | 8310           | 4.8 [4.2-5.4]     | 95.6 [94.4-96.6]   | < 0.001                      | 0.753                     |
| Cross sectional design         | 8.3 [5.6-11.4]             | [0-27.6]                       | 23               | 8572           | 4.8 [4.2-5.4]     | 95.6 [94.4-96.6]   | < 0.001                      | 0.777                     |
| Low risk of bias               | 9.5 [6.5-13.1]             | [0.3-28.2]                     | 17               | 5578           | 4.1 [3.5-4.8]     | 94 [91.8-95.6]     | < 0.001                      | 0.331                     |
| <b>HAdV</b>                    |                            |                                |                  |                |                   |                    |                              |                           |
| Overall                        | 6.1 [4.4-8]                | [0.2-18.1]                     | 26               | 6734           | 3 [2.6-3.5]       | 88.9 [85-91.8]     | < 0.001                      | 0.085                     |
| < 1 Year                       | 6.7 [3.6-10.6]             | [0-23.1]                       | 7                | 1938           | 3 [2.2-4]         | 88.6 [78.9-93.8]   | < 0.001                      | 0.538                     |
| Hospitalized                   | 6.1 [4.2-8.4]              | [0.1-18.9]                     | 20               | 5963           | 3.3 [2.8-3.9]     | 90.6 [87-93.3]     | < 0.001                      | 0.121                     |
| Bronchiolitis definition given | 6.2 [4.4-8.2]              | [0.2-18.2]                     | 24               | 6386           | 3 [2.6-3.5]       | 89 [84.9-92]       | < 0.001                      | 0.097                     |
| Cross sectional design         | 6.4 [4.5-8.6]              | [0.2-19.2]                     | 23               | 6112           | 3.1 [2.6-3.6]     | 89.5 [85.6-92.4]   | < 0.001                      | 0.149                     |
| Low risk of bias               | 6.4 [4.2-8.9]              | [0.1-20]                       | 18               | 4632           | 3.1 [2.6-3.7]     | 89.7 [85.2-92.8]   | < 0.001                      | 0.052                     |
| <b>HPIV</b>                    |                            |                                |                  |                |                   |                    |                              |                           |
| Overall                        | 5.4 [3.8-7.3]              | [0-17.9]                       | 28               | 7933           | 3.3 [2.9-3.8]     | 91 [88.1-93.2]     | < 0.001                      | 0.932                     |
| < 1 Year                       | 3.1 [1.9-4.6]              | [0.1-9.3]                      | 10               | 3185           | 2.1 [1.6-2.9]     | 78.1 [60.1-88]     | < 0.001                      | 0.531                     |
| Hospitalized                   | 5 [3.3-6.9]                | [0-16.7]                       | 21               | 6707           | 3.4 [2.9-3.9]     | 91.1 [87.8-93.5]   | < 0.001                      | 0.238                     |
| Bronchiolitis definition given | 5 [3.4-6.8]                | [0-16.7]                       | 26               | 7585           | 3.3 [2.8-3.8]     | 90.6 [87.4-92.9]   | < 0.001                      | 0.682                     |
| Cross sectional design         | 5.3 [3.6-7.2]              | [0-17.2]                       | 24               | 6856           | 3.2 [2.8-3.7]     | 90.3 [86.8-92.8]   | < 0.001                      | 0.528                     |

|                                | Prevalence [95% CI] | 95% Prediction interval | N Studies | N Cases | H [95% CI]    | I2 [95% CI]      | P-Value Heterogeneity | P-Value Egger test |
|--------------------------------|---------------------|-------------------------|-----------|---------|---------------|------------------|-----------------------|--------------------|
| Low risk of bias               | 5 [3.1-7.2]         | [0-18]                  | 20        | 5831    | 3.4 [2.9-4]   | 91.5 [88.3-93.9] | < 0.001               | 0.983              |
| <b>HMPV</b>                    |                     |                         |           |         |               |                  |                       |                    |
| Overall                        | 5.4 [4.4-6.4]       | [1.4-11.5]              | 32        | 9908    | 2.1 [1.8-2.5] | 76.9 [67.7-83.5] | < 0.001               | 0.043              |
| < 1 Year                       | 3.4 [2.4-4.7]       | [0.5-8.4]               | 12        | 3936    | 1.9 [1.4-2.5] | 71.4 [48.6-84.1] | < 0.001               | 0.633              |
| Hospitalized                   | 5.1 [4.2-6.1]       | [1.9-9.7]               | 26        | 8850    | 1.8 [1.5-2.2] | 68.8 [53.2-79.1] | < 0.001               | 0.238              |
| Bronchiolitis definition given | 5.4 [4.4-6.4]       | [1.4-11.5]              | 32        | 9908    | 2.1 [1.8-2.5] | 76.9 [67.7-83.5] | < 0.001               | 0.043              |
| Cross sectional design         | 5.6 [4.6-6.7]       | [1.9-11.1]              | 28        | 8831    | 1.9 [1.6-2.3] | 72.7 [60.3-81.2] | < 0.001               | 0.04               |
| Low risk of bias               | 5.7 [4.5-7]         | [1.3-12.8]              | 26        | 8034    | 2.2 [1.9-2.7] | 79.6 [70.8-85.8] | < 0.001               | 0.07               |
| <b>Influenza</b>               |                     |                         |           |         |               |                  |                       |                    |
| Overall                        | 3.2 [2.2-4.3]       | [0-10]                  | 24        | 6571    | 2.4 [2-2.8]   | 82.1 [74.3-87.5] | < 0.001               | 0.032              |
| < 1 Year                       | 1.6 [0.8-2.6]       | [0-5.2]                 | 8         | 2694    | 1.7 [1.2-2.5] | 65.4 [26.3-83.7] | 0.005                 | 0.422              |
| Hospitalized                   | 2.6 [1.8-3.6]       | [0.1-7.8]               | 19        | 5734    | 2.1 [1.7-2.6] | 77.4 [65.1-85.4] | < 0.001               | 0.407              |
| Bronchiolitis definition given | 3.2 [2.1-4.4]       | [0-10.2]                | 23        | 6391    | 2.4 [2-2.9]   | 82.8 [75.3-88.1] | < 0.001               | 0.037              |
| Cross sectional design         | 3 [2-4.3]           | [0-10.1]                | 21        | 5764    | 2.4 [2-2.9]   | 82.8 [74.8-88.3] | < 0.001               | 0.083              |
| Low risk of bias               | 3.2 [2.1-4.6]       | [0-10.6]                | 19        | 5561    | 2.5 [2.1-3.1] | 84.2 [76.7-89.4] | < 0.001               | 0.08               |
| <b>HCoV</b>                    |                     |                         |           |         |               |                  |                       |                    |
| Overall                        | 2.9 [2-4]           | [0-9.9]                 | 27        | 7431    | 2.5 [2.1-2.9] | 83.5 [76.9-88.1] | < 0.001               | 0.918              |
| < 1 Year                       | 2.6 [1-4.8]         | [0-13.3]                | 10        | 3056    | 3.1 [2.4-4]   | 89.7 [83.2-93.7] | < 0.001               | 0.744              |

|                                | Prevalence [95% CI] | 95% Prediction interval | N Studies | N Cases | H [95% CI]    | I2 [95% CI]      | P-Value Heterogeneity | P-Value Egger test |
|--------------------------------|---------------------|-------------------------|-----------|---------|---------------|------------------|-----------------------|--------------------|
| Hospitalized                   | 2.6 [1.6-3.8]       | [0-9.4]                 | 22        | 6435    | 2.5 [2.1-3]   | 84 [76.9-88.9]   | < 0.001               | 0.556              |
| Bronchiolitis definition given | 2.9 [2-4.1]         | [0-10]                  | 26        | 7313    | 2.5 [2.1-3]   | 84.1 [77.7-88.6] | < 0.001               | 0.931              |
| Cross sectional design         | 2.6 [1.7-3.7]       | [0-8.8]                 | 23        | 6354    | 2.3 [1.9-2.8] | 81.1 [72.5-87]   | < 0.001               | 0.744              |
| Low risk of bias               | 2.8 [1.8-4]         | [0-9.4]                 | 20        | 5559    | 2.3 [1.9-2.8] | 81.5 [72.3-87.6] | < 0.001               | 0.701              |
| <b>EV</b>                      |                     |                         |           |         |               |                  |                       |                    |
| Overall                        | 2.9 [1.6-4.5]       | [0-11.4]                | 15        | 4202    | 2.7 [2.2-3.3] | 86.1 [78.6-90.9] | < 0.001               | 0.886              |
| < 1 Year                       | 2.2 [1.4-3]         | [0.7-4.3]               | 4         | 1303    | 1 [1-2.3]     | 0 [0-80.5]       | 0.502                 | 0.292              |
| Hospitalized                   | 2.2 [1-3.6]         | [0-9.1]                 | 11        | 3700    | 2.6 [2-3.3]   | 84.7 [74.3-90.9] | < 0.001               | 0.115              |
| Bronchiolitis definition given | 2.8 [1.4-4.6]       | [0-11.7]                | 14        | 4022    | 2.8 [2.2-3.5] | 87 [79.9-91.6]   | < 0.001               | 0.849              |
| Cross sectional design         | 2.9 [1.5-4.7]       | [0-12]                  | 14        | 3984    | 2.8 [2.2-3.5] | 87 [79.9-91.6]   | < 0.001               | 0.911              |
| Low risk of bias               | 3.4 [1.7-5.6]       | [0-13.5]                | 11        | 3386    | 2.8 [2.2-3.6] | 87.7 [79.9-92.5] | < 0.001               | 0.863              |

CI: confidence interval; RV: Rhinovirus; HCoV: Human Coronavirus; HPIV: Human Parainfluenzavirus; HMPV: Human Metapneumovirus; HRSV: Human Respiratory Syncytial Virus; HAdV: Human Adenovirus; HBoV: Human Bocavirus; EV: Enterovirus; NA: not applicable.

S7 Table. Subgroup prevalence of respiratory viral infections in children with acute bronchiolitis

|                               | Prevalence [95% CI] | 95% Prediction interval | H [95% CI]    | N Studies | N Cases | I2 [95% CI]      | P-Value Heterogeneity | P-Value Egger test | P-value subgroup difference |
|-------------------------------|---------------------|-------------------------|---------------|-----------|---------|------------------|-----------------------|--------------------|-----------------------------|
| <b>HRSV</b>                   |                     |                         |               |           |         |                  |                       |                    |                             |
| <b>Study period</b>           |                     |                         |               |           |         |                  |                       |                    | 0.304                       |
| Continuous study period       | 57.3 [51.6-62.9]    | [26.1-85.6]             | 4.9 [4.4-5.4] | 30        | 7454    | 95.8 [94.9-96.6] | < 0.001               | 0.647              |                             |
| Interrupted time series study | 62.4 [54.3-70.2]    | [28.7-90.5]             | 6.6 [5.8-7.5] | 14        | 7073    | 97.7 [97-98.2]   | < 0.001               | 0.622              |                             |
| <b>WHO Region</b>             |                     |                         |               |           |         |                  |                       |                    | < 0.001                     |
| America                       | 64 [58.2-69.6]      | [42.8-82.7]             | 3.5 [2.8-4.4] | 10        | 4731    | 92 [87.4-94.9]   | < 0.001               | 0.104              |                             |
| Eastern Mediterranean         | 46.9 [40.2-53.7]    | [0-100]                 | 2.2 [1.3-4]   | 3         | 1240    | 80 [36.8-93.7]   | 0.007                 | 0.386              |                             |
| Europe                        | 59 [52.9-64.9]      | [27.4-86.9]             | 5.3 [4.7-5.9] | 26        | 7636    | 96.4 [95.6-97.1] | < 0.001               | 0.815              |                             |
| Northern America              | 82.6 [77.8-86.9]    | NA                      | NA            | 1         | 270     | NA               | 1                     | NA                 |                             |
| South-East Asia               | 64.7 [57.3-71.7]    | NA                      | NA            | 1         | 170     | NA               | 1                     | NA                 |                             |
| Western Pacific               | 51.3 [32.1-70.3]    | [0-100]                 | 6.1 [4.6-8.1] | 4         | 1304    | 97.3 [95.3-98.5] | < 0.001               | 0.705              |                             |
| <b>Sample type</b>            |                     |                         |               |           |         |                  |                       |                    | < 0.001                     |
| Nasal secretions              | 50 [36.5-63.5]      | [1.6-98.4]              | 4 [2.8-5.8]   | 4         | 902     | 93.9 [87.4-97]   | < 0.001               | 0.116              |                             |
| Nasopharyngeal secretions     | 61 [56.8-65.2]      | [34-84.9]               | 5 [4.6-5.5]   | 40        | 14053   | 96 [95.2-96.6]   | < 0.001               | 0.465              |                             |
| Throat secretions             | 24.5 [20.4-28.9]    | NA                      | NA            | 1         | 396     | NA               | 1                     | NA                 |                             |
| <b>RV</b>                     |                     |                         |               |           |         |                  |                       |                    |                             |
| <b>Study period</b>           |                     |                         |               |           |         |                  |                       |                    | 0.391                       |
| Continuous study period       | 20.4 [16.9-24]      | [6.3-39.6]              | 3.3 [2.8-3.8] | 24        | 6199    | 90.8 [87.7-93.2] | < 0.001               | 0.314              |                             |
| Interrupted time series study | 18 [13.7-22.7]      | [4.5-37.8]              | 4.2 [3.5-5.1] | 11        | 5944    | 94.4 [91.8-96.2] | < 0.001               | 0.178              |                             |
| <b>WHO Region</b>             |                     |                         |               |           |         |                  |                       |                    | < 0.001                     |
| America                       | 17.8 [13.6-22.4]    | [5.5-34.9]              | 3.2 [2.5-4.2] | 9         | 4570    | 90.5 [84.2-94.3] | < 0.001               | 0.187              |                             |
| Eastern Mediterranean         | 18.8 [8.3-32.3]     | NA                      | 4.9 [2.9-8.3] | 2         | 1072    | 95.9 [88.4-98.6] | < 0.001               | NA                 |                             |

|                               | Prevalence [95% CI] | 95% Prediction interval | H [95% CI]    | N Studies | N Cases | I2 [95% CI]      | P-Value Heterogeneity | P-Value Egger test | P-value subgroup difference |
|-------------------------------|---------------------|-------------------------|---------------|-----------|---------|------------------|-----------------------|--------------------|-----------------------------|
| Europe                        | 19.3 [15.9-23]      | [5.1-39.5]              | 3.6 [3.1-4.1] | 24        | 6557    | 92.2 [89.7-94.1] | < 0.001               | 0.905              |                             |
| Western Pacific               | 33.5 [30.2-36.8]    | NA                      | NA            | 1         | 768     | NA               | 1                     | NA                 |                             |
| <b>Sample type</b>            |                     |                         |               |           |         |                  |                       |                    | 0.243                       |
| Nasal secretions              | 12.7 [3.9-25.4]     | [0-100]                 | 4.7 [3.1-6.9] | 3         | 808     | 95.4 [89.9-97.9] | < 0.001               | 0.762              |                             |
| Nasopharyngeal secretions     | 20 [17.3-22.8]      | [7.2-37]                | 3.6 [3.2-4]   | 33        | 12159   | 92.2 [90.1-93.9] | < 0.001               | 0.441              |                             |
| <b>HBoV</b>                   |                     |                         |               |           |         |                  |                       |                    |                             |
| <b>Study period</b>           |                     |                         |               |           |         |                  |                       |                    | 0.09                        |
| Continuous study period       | 9.4 [6.4-12.9]      | [0.1-29.1]              | 4.5 [4-5.2]   | 19        | 6897    | 95.2 [93.6-96.3] | < 0.001               | 0.497              |                             |
| Interrupted time series study | 5.1 [2.2-9.1]       | [0-30.4]                | 2.4 [1.5-3.9] | 4         | 985     | 82.9 [56.4-93.3] | 0.001                 | 0.386              |                             |
| <b>WHO Region</b>             |                     |                         |               |           |         |                  |                       |                    | < 0.001                     |
| America                       | 4.7 [0-15.2]        | [0-100]                 | 3.8 [2.4-5.9] | 3         | 525     | 93.1 [83.1-97.2] | < 0.001               | 0.11               |                             |
| Eastern Mediterranean         | 4 [2.9-5.3]         | NA                      | 1             | 2         | 1072    | 0                | 0.913                 | NA                 |                             |
| Europe                        | 9 [5.4-13.5]        | [0-33.4]                | 4.9 [4.3-5.7] | 16        | 4947    | 95.9 [94.5-96.9] | < 0.001               | 0.884              |                             |
| Western Pacific               | 11.6 [10.3-13]      | [4.3-21.7]              | 1 [1-2.9]     | 3         | 2162    | 0 [0-88.3]       | 0.411                 | 0.47               |                             |
| <b>Sample type</b>            |                     |                         |               |           |         |                  |                       |                    | 0.545                       |
| Nasal secretions              | 6.6 [2.7-12]        | [0-97]                  | 2.6 [1.5-4.5] | 3         | 808     | 85.6 [57.9-95.1] | 0.001                 | 0.344              |                             |
| Nasopharyngeal secretions     | 8.4 [5.4-12]        | [0-29.4]                | 5 [4.4-5.7]   | 20        | 7502    | 96 [94.9-96.9]   | < 0.001               | 0.784              |                             |
| Throat secretions             | 9.8 [7.1-13]        | NA                      | NA            | 1         | 396     | NA               | 1                     | NA                 |                             |
| <b>HAdV</b>                   |                     |                         |               |           |         |                  |                       |                    |                             |
| <b>Study period</b>           |                     |                         |               |           |         |                  |                       |                    | 0.081                       |
| Continuous study period       | 6.6 [4.7-8.8]       | [0.3-18.8]              | 3 [2.5-3.5]   | 22        | 5786    | 88.6 [84.1-91.8] | < 0.001               | 0.081              |                             |
| Interrupted time series study | 3.7 [1.6-6.5]       | [0-20.2]                | 1.9 [1.1-3.2] | 4         | 948     | 72 [20.7-90.1]   | 0.013                 | 0.501              |                             |
| <b>WHO Region</b>             |                     |                         |               |           |         |                  |                       |                    | < 0.001                     |
| America                       | 1.5 [0.4-3.2]       | [0-31]                  | 1.2 [1-3.6]   | 3         | 525     | 24.9 [0-92.2]    | 0.264                 | 0.454              |                             |

|                               | Prevalence [95% CI] | 95% Prediction interval | H [95% CI]    | N Studies | N Cases | I2 [95% CI]      | P-Value Heterogeneity | P-Value Egger test | P-value subgroup difference |
|-------------------------------|---------------------|-------------------------|---------------|-----------|---------|------------------|-----------------------|--------------------|-----------------------------|
| Eastern Mediterranean         | 6.9 [4.6-9.6]       | [0-51.6]                | 1.6 [1-3]     | 3         | 1240    | 61.8 [0-89.1]    | 0.073                 | 0.177              |                             |
| Europe                        | 6.3 [4.5-8.4]       | [0.7-16.4]              | 2.3 [1.9-2.9] | 18        | 3931    | 81.8 [72.2-88]   | < 0.001               | 0.543              |                             |
| Northern America              | 5.9 [3.4-9.1]       | NA                      | NA            | 1         | 270     | NA               | 1                     | NA                 |                             |
| Western Pacific               | 18.1 [15.5-20.9]    | NA                      | NA            | 1         | 768     | NA               | 1                     | NA                 |                             |
| <b>Sample type</b>            |                     |                         |               |           |         |                  |                       |                    | 0.532                       |
| Nasal secretions              | 7.3 [4.6-10.4]      | NA                      | NA            | 1         | 316     | NA               | 1                     | NA                 |                             |
| Nasopharyngeal secretions     | 6 [4.2-8.1]         | [0.1-18.5]              | 3.1 [2.6-3.6] | 25        | 6418    | 89.3 [85.5-92.1] | < 0.001               | 0.092              |                             |
| <b>HPIV</b>                   |                     |                         |               |           |         |                  |                       |                    |                             |
| <b>Study period</b>           |                     |                         |               |           |         |                  |                       |                    | 0.005                       |
| Continuous study period       | 6.7 [4.6-9.1]       | [0.1-20.5]              | 3.3 [2.8-3.9] | 20        | 5687    | 91 [87.5-93.5]   | < 0.001               | 0.943              |                             |
| Interrupted time series study | 2.8 [1.4-4.6]       | [0-10.3]                | 2.2 [1.6-3.1] | 8         | 2246    | 79.3 [59.6-89.4] | < 0.001               | 0.622              |                             |
| <b>WHO Region</b>             |                     |                         |               |           |         |                  |                       |                    | < 0.001                     |
| America                       | 6 [0.8-15]          | [0-67.2]                | 4.4 [3.1-6.2] | 4         | 980     | 94.8 [89.8-97.4] | < 0.001               | 0.166              |                             |
| Eastern Mediterranean         | 11.6 [6.8-17.4]     | [0-95.4]                | 2.7 [1.6-4.6] | 3         | 1240    | 86.4 [60.6-95.3] | 0.001                 | 0.424              |                             |
| Europe                        | 3.9 [2.7-5.3]       | [0.3-10.8]              | 2.1 [1.7-2.7] | 19        | 4675    | 78.3 [66.7-85.9] | < 0.001               | 0.283              |                             |
| Northern America              | 8.1 [5.2-11.7]      | NA                      | NA            | 1         | 270     | NA               | 1                     | NA                 |                             |
| Western Pacific               | 13.7 [11.3-16.2]    | NA                      | NA            | 1         | 768     | NA               | 1                     | NA                 |                             |
| <b>Sample type</b>            |                     |                         |               |           |         |                  |                       |                    | 0.086                       |
| Nasal secretions              | 2.8 [0.8-5.9]       | [0-76.1]                | 2.1 [1.2-3.8] | 3         | 808     | 78.1 [29.5-93.2] | 0.01                  | 0.718              |                             |
| Nasopharyngeal secretions     | 5.8 [4-7.9]         | [0-19]                  | 3.4 [2.9-3.9] | 25        | 7125    | 91.4 [88.5-93.5] | < 0.001               | 0.969              |                             |
| <b>HMPV</b>                   |                     |                         |               |           |         |                  |                       |                    |                             |
| <b>Study period</b>           |                     |                         |               |           |         |                  |                       |                    | 0.005                       |
| Continuous study period       | 6.3 [5.2-7.4]       | [2.6-11.2]              | 1.7 [1.3-2.1] | 24        | 7018    | 64.3 [44.8-76.9] | < 0.001               | 0.012              |                             |
| Interrupted time series study | 3.1 [1.5-5.1]       | [0-11.8]                | 2.3 [1.6-3.3] | 7         | 2066    | 81.4 [62.6-90.8] | < 0.001               | 0.735              |                             |



|                               | Prevalence [95% CI] | 95% Prediction interval | H [95% CI]    | N Studies | N Cases | I2 [95% CI]      | P-Value Heterogeneity | P-Value Egger test | P-value subgroup difference |
|-------------------------------|---------------------|-------------------------|---------------|-----------|---------|------------------|-----------------------|--------------------|-----------------------------|
| <b>WHO Region</b>             |                     |                         |               |           |         |                  |                       |                    | 0.443                       |
| America                       | 5.4 [1.6-11.1]      | [0-33.5]                | 3 [2.1-4.4]   | 5         | 1036    | 89 [77-94.7]     | < 0.001               | 0.117              |                             |
| Eastern Mediterranean         | 6.2 [4-8.9]         | NA                      | NA            | 1         | 369     | NA               | 1                     | NA                 |                             |
| Europe                        | 5.7 [4.4-7.2]       | [1.2-12.8]              | 2 [1.7-2.5]   | 21        | 5355    | 76.1 [63.6-84.3] | < 0.001               | 0.017              |                             |
| Northern America              | 3.3 [1.5-5.9]       | NA                      | NA            | 1         | 270     | NA               | 1                     | NA                 |                             |
| South-East Asia               | 3.5 [1.2-6.9]       | NA                      | NA            | 1         | 170     | NA               | 1                     | NA                 |                             |
| Western Pacific               | 5.5 [4.5-6.7]       | [0-20.3]                | 1.3 [1-2.3]   | 3         | 2708    | 38.6 [0-80.8]    | 0.196                 | 0.692              |                             |
| <b>Sample type</b>            |                     |                         |               |           |         |                  |                       |                    | 0.198                       |
| Nasal secretions              | 3.7 [1.4-7]         | [0-25.9]                | 2.8 [1.8-4.4] | 4         | 1750    | 87.6 [70.5-94.8] | < 0.001               | 0.655              |                             |
| Nasopharyngeal secretions     | 5.7 [4.6-6.8]       | [1.6-11.8]              | 2 [1.7-2.4]   | 28        | 8158    | 74.7 [63.5-82.5] | < 0.001               | 0.017              |                             |
| <b>Influenza</b>              |                     |                         |               |           |         |                  |                       |                    |                             |
| <b>Study period</b>           |                     |                         |               |           |         |                  |                       |                    | 0.014                       |
| Continuous study period       | 4 [2.6-5.8]         | [0-12.8]                | 2.5 [2-3.1]   | 16        | 4325    | 84.4 [76.1-89.9] | < 0.001               | 0.055              |                             |
| Interrupted time series study | 1.9 [1-3]           | [0-5.9]                 | 1.6 [1.1-2.4] | 8         | 2246    | 62.8 [20-82.7]   | 0.009                 | 0.313              |                             |
| <b>WHO Region</b>             |                     |                         |               |           |         |                  |                       |                    | 0.058                       |
| America                       | 2.8 [0.5-6.4]       | [0-28]                  | 2.5 [1.6-4]   | 4         | 980     | 83.9 [59.4-93.6] | < 0.001               | 0.426              |                             |
| Eastern Mediterranean         | 1.1 [0.2-2.5]       | NA                      | NA            | 1         | 369     | NA               | 1                     | NA                 |                             |
| Europe                        | 3.5 [2.2-5]         | [0-11.7]                | 2.4 [2-3]     | 18        | 4454    | 83.3 [74.8-88.9] | < 0.001               | 0.034              |                             |
| Western Pacific               | 3.3 [2.1-4.6]       | NA                      | NA            | 1         | 768     | NA               | 1                     | NA                 |                             |
| <b>Sample type</b>            |                     |                         |               |           |         |                  |                       |                    | 0.677                       |
| Nasal secretions              | 2.2 [0-9.2]         | [0-100]                 | 4.5 [3-6.7]   | 3         | 808     | 95 [88.8-97.8]   | < 0.001               | 0.74               |                             |
| Nasopharyngeal secretions     | 3.2 [2.3-4.4]       | [0.2-9.1]               | 2.1 [1.7-2.6] | 21        | 5763    | 77.3 [65.7-85]   | < 0.001               | 0.006              |                             |
| <b>HCoV</b>                   |                     |                         |               |           |         |                  |                       |                    |                             |
| <b>Study period</b>           |                     |                         |               |           |         |                  |                       |                    | 0.589                       |
| Continuous study period       | 3.1 [2-4.4]         | [0-9.8]                 | 2.3 [1.9-2.8] | 20        | 5365    | 80.9 [71.3-87.2] | < 0.001               | 0.789              |                             |

|                               | Prevalence [95% CI] | 95% Prediction interval | H [95% CI]    | N Studies | N Cases | I2 [95% CI]      | P-Value Heterogeneity | P-Value Egger test | P-value subgroup difference |
|-------------------------------|---------------------|-------------------------|---------------|-----------|---------|------------------|-----------------------|--------------------|-----------------------------|
| Interrupted time series study | 2.5 [0.8-5.1]       | [0-14.6]                | 3 [2.2-4]     | 7         | 2066    | 88.7 [79.2-93.9] | < 0.001               | 0.717              |                             |
| <b>WHO Region</b>             |                     |                         |               |           |         |                  |                       |                    | < 0.001                     |
| America                       | 1.5 [0.8-2.4]       | [0.2-3.7]               | 1 [1-2]       | 4         | 980     | 0 [0-75.5]       | 0.598                 | 0.625              |                             |
| Eastern Mediterranean         | 4.2 [1.4-8.4]       | NA                      | 2.7 [1.4-5.4] | 2         | 1072    | 86.5 [46.7-96.6] | 0.006                 | NA                 |                             |
| Europe                        | 2.6 [1.5-4.1]       | [0-10.4]                | 2.4 [2-3]     | 18        | 4223    | 83 [74.3-88.8]   | < 0.001               | 0.639              |                             |
| Northern America              | 10.7 [7.3-14.7]     | NA                      | NA            | 1         | 270     | NA               | 1                     | NA                 |                             |
| Western Pacific               | 4.4 [2.4-7]         | NA                      | 1.3 NA        | 2         | 886     | 37.7 NA          | 0.205                 | NA                 |                             |
| <b>Sample type</b>            |                     |                         |               |           |         |                  |                       |                    | 0.071                       |
| Nasal secretions              | 1.1 [0-3.3]         | [0-70]                  | 2.1 [1.2-3.8] | 3         | 808     | 77.7 [27.9-93.1] | 0.011                 | 0.79               |                             |
| Nasopharyngeal secretions     | 3.2 [2.2-4.4]       | [0-10.3]                | 2.4 [2-2.9]   | 24        | 6623    | 82.8 [75.5-88]   | < 0.001               | 0.969              |                             |
| <b>EV</b>                     |                     |                         |               |           |         |                  |                       |                    |                             |
| <b>Study period</b>           |                     |                         |               |           |         |                  |                       |                    | 0.466                       |
| Continuous study period       | 2.6 [1-4.7]         | [0-13.3]                | 3.1 [2.4-3.9] | 11        | 3254    | 89.4 [83-93.4]   | < 0.001               | 0.716              |                             |
| Interrupted time series study | 3.6 [2.1-5.5]       | [0-12.1]                | 1.3 [1-2.3]   | 4         | 948     | 44.1 [0-81.3]    | 0.147                 | 0.304              |                             |
| <b>WHO Region</b>             |                     |                         |               |           |         |                  |                       |                    | < 0.001                     |
| America                       | 20.8 [12.4-30.6]    | NA                      | NA            | 1         | 77      | NA               | 1                     | NA                 |                             |
| Eastern Mediterranean         | 1.6 [0.5-3.2]       | NA                      | NA            | 1         | 369     | NA               | 1                     | NA                 |                             |
| Europe                        | 2 [1.2-2.9]         | [0.2-5.2]               | 1.5 [1.1-2.1] | 12        | 2988    | 55.3 [14.5-76.6] | 0.01                  | 0.632              |                             |
| Western Pacific               | 7.8 [6-9.8]         | NA                      | NA            | 1         | 768     | NA               | 1                     | NA                 |                             |
| <b>Sample type</b>            |                     |                         |               |           |         |                  |                       |                    | NA                          |
| Nasopharyngeal secretions     | 2.9 [1.6-4.5]       | [0-11.4]                | 2.7 [2.2-3.3] | 15        | 4202    | 86.1 [78.6-90.9] | < 0.001               | 0.886              |                             |

CI: confidence interval; RV: Rhinovirus; HCoV: Human Coronavirus; HPIV: Human Parainfluenzavirus; HMPV: Human Metapneumovirus; HRSV: Human Respiratory Syncytial Virus; HAdV: Human Adenovirus; HBoV: Human Bocavirus; EV: Enterovirus; NA: not applicable.



**S1 Fig. Global prevalence of Respiratory Viruses in children < 2 years with bronchiolitis**

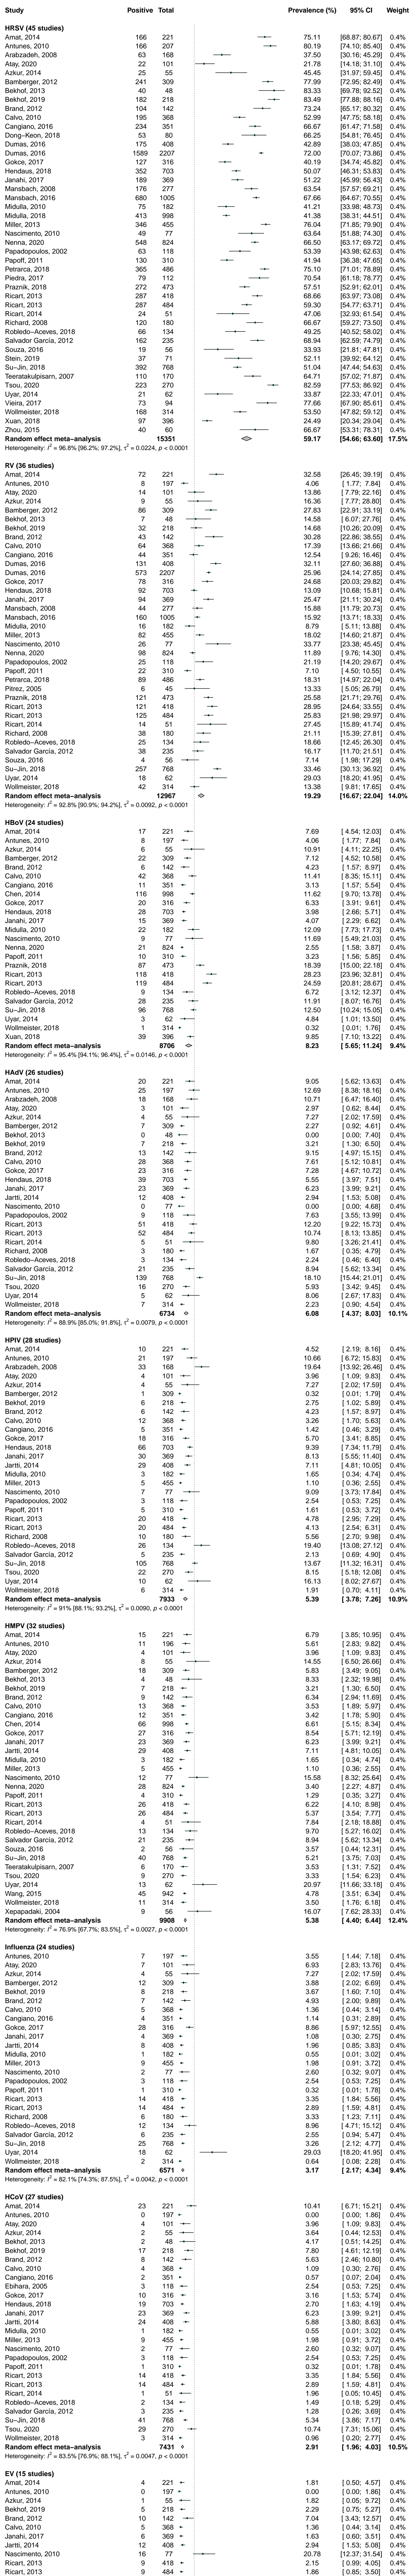



**S2 Fig. Codetection rate of viral infections among children < 2 years with bronchiolitis**

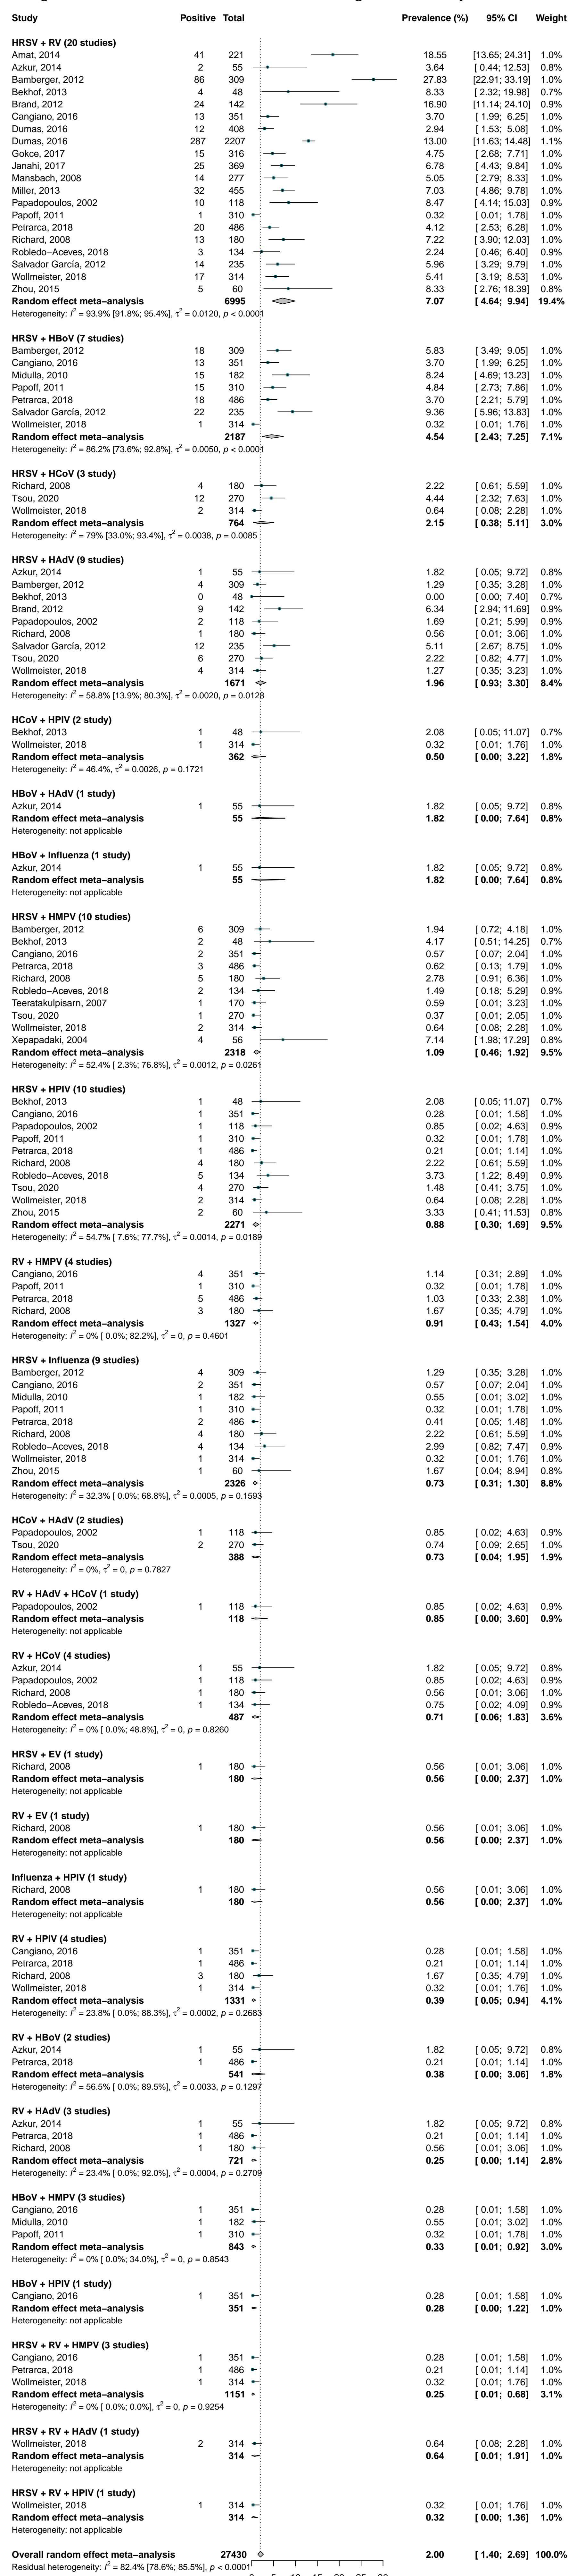



S4 Fig. Funnel plot for publication for RV in people with bronchiolitis

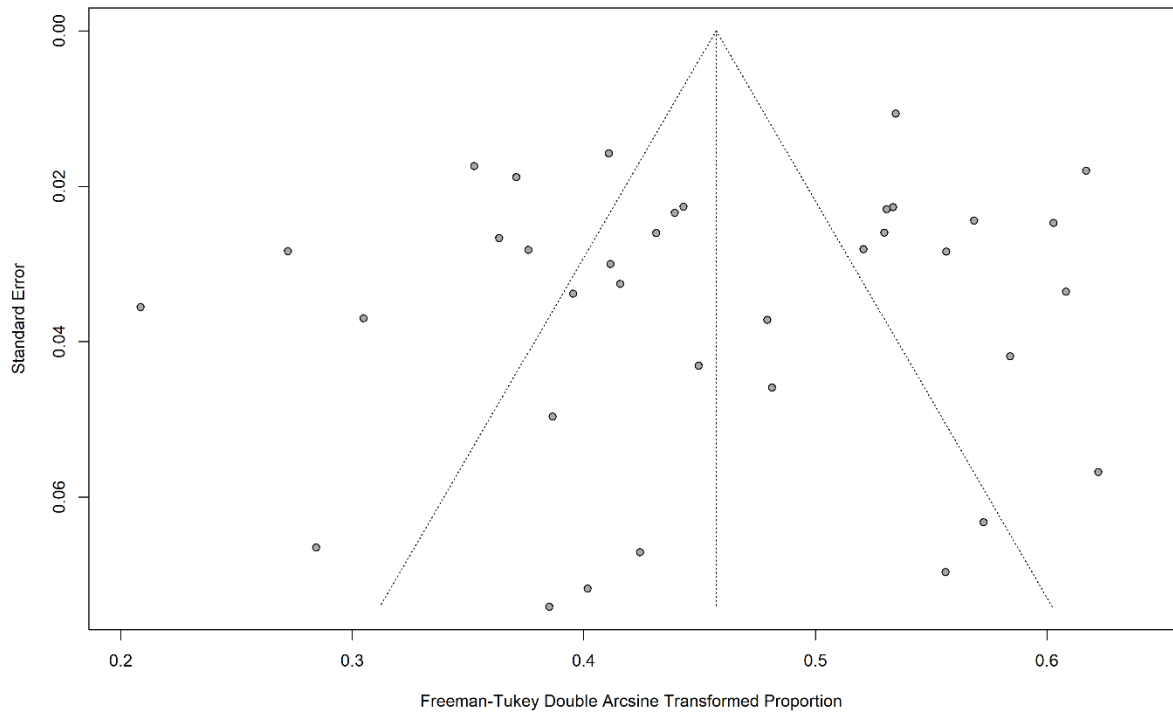



S6 Fig. Funnel plot for publication for HAdV in people with bronchiolitis

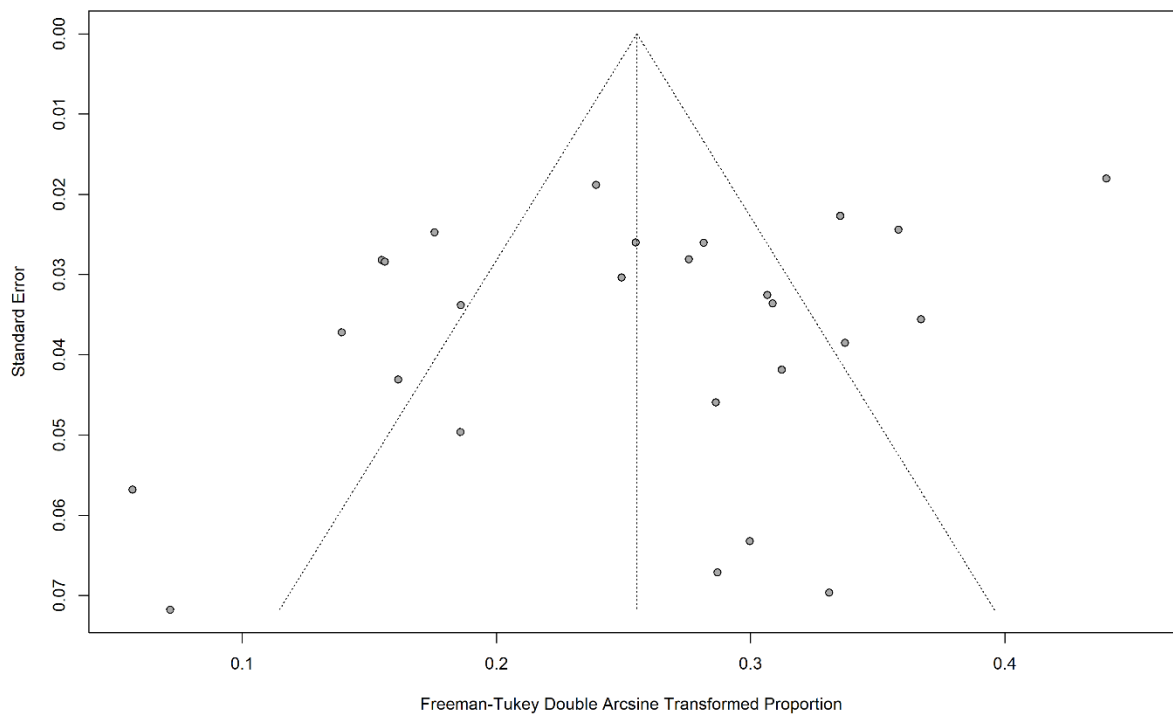





S8 Fig. Funnel plot for publication for HPIV in people with bronchiolitis

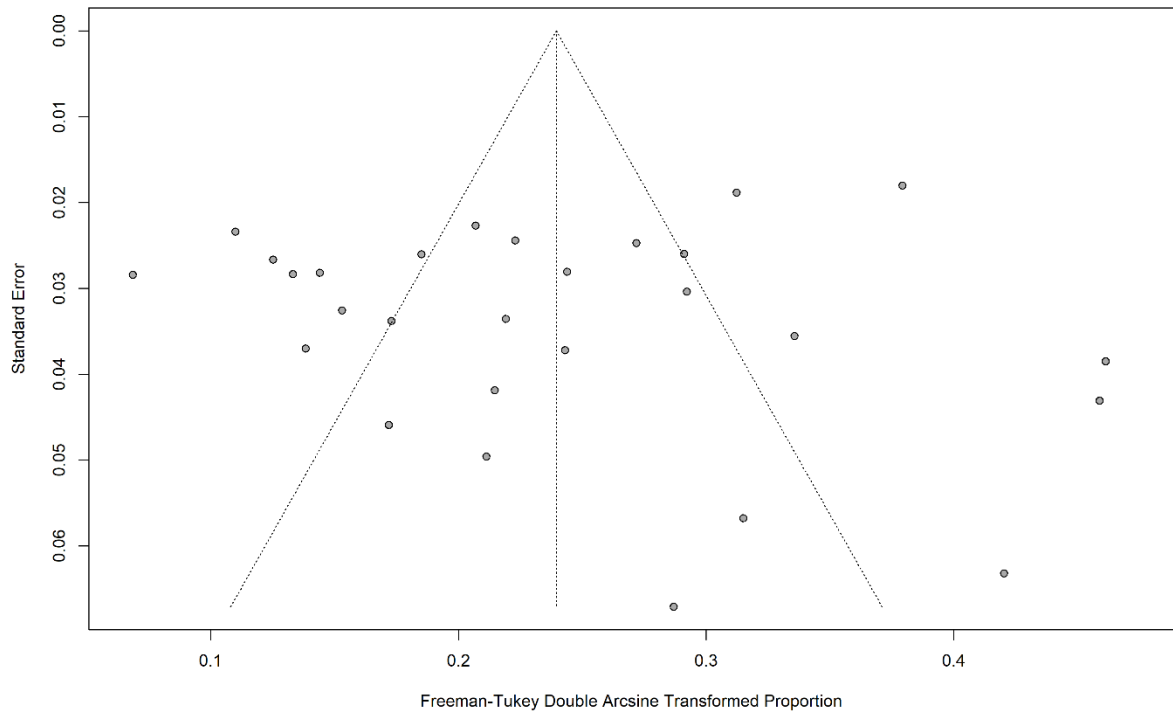

S9 Fig. Funnel plot for publication for Influenza in people with bronchiolitis

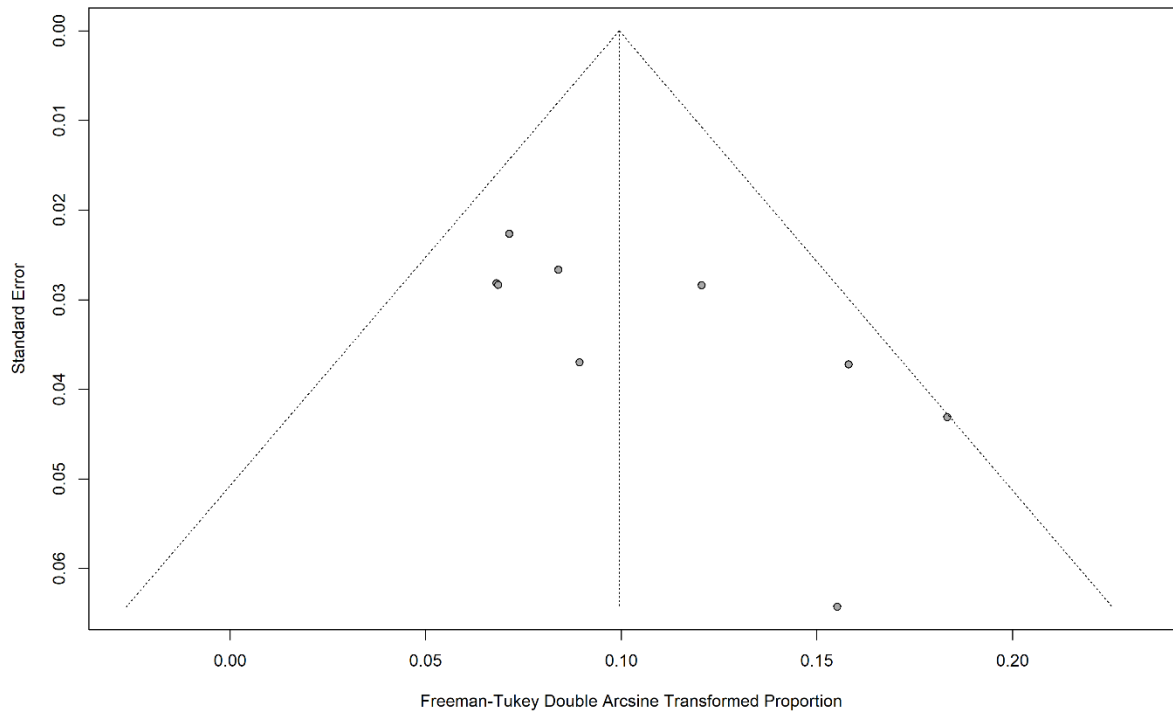

S10 Fig. Funnel plot for publication for EV in people with bronchiolitis

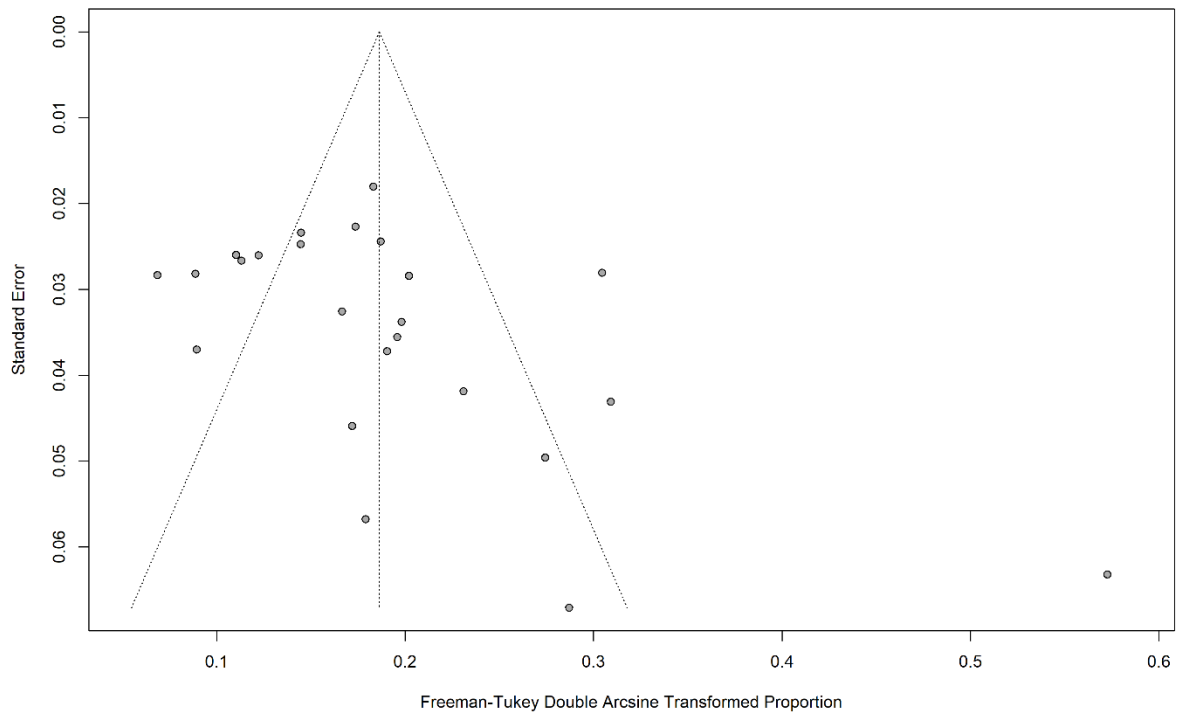

S11 Fig. Funnel plot for publication for HCoV in people with bronchiolitis

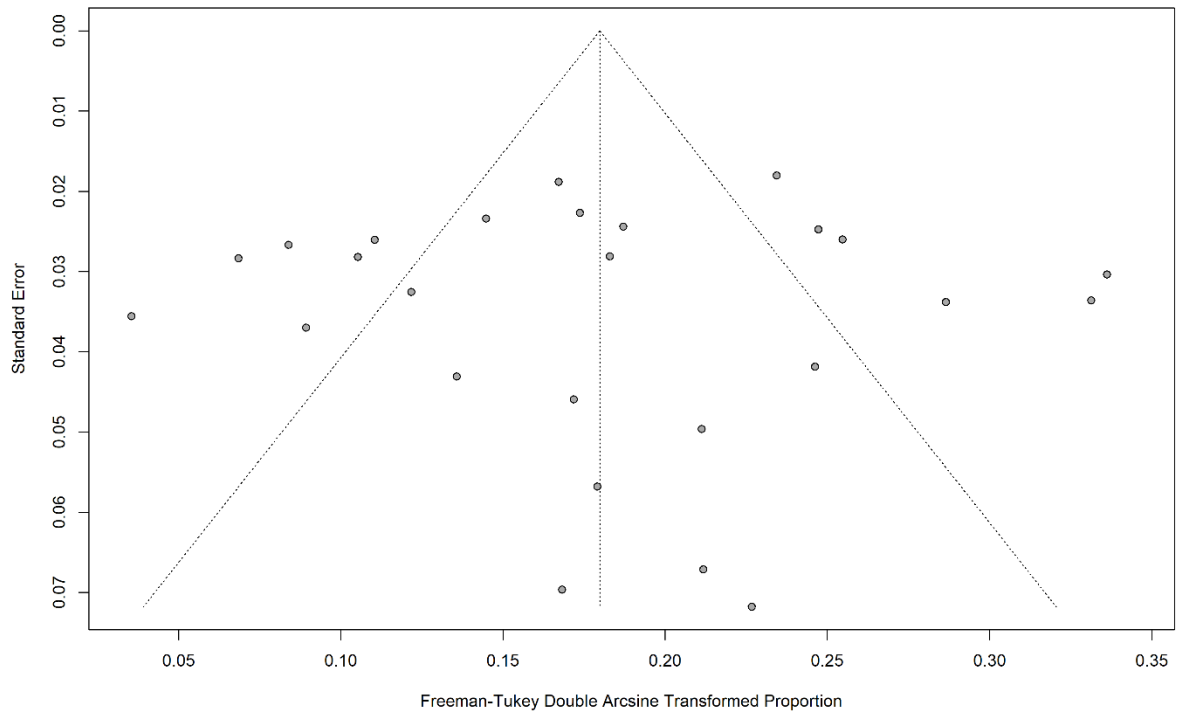

Supplement: Supplementary file [file 2020.08.28.20183681-1.pdf]
